1 **Heterogeneity in surface sensing produces a division of labor in *Pseudomonas***  
2 ***aeruginosa* populations**

3 **Authors:** Catherine R. Armbruster<sup>1</sup>, Calvin K. Lee<sup>2,3,4</sup>, Jessica Parker-Gilham<sup>1</sup>, Jaime de  
4 Anda<sup>2,3,4</sup>, Aiguo Xia<sup>5</sup>, Boo Shan Tseng<sup>8</sup>, Lucas R. Hoffman<sup>1,9</sup>, Fan Jin<sup>5,6</sup>, Caroline S.  
5 Harwood<sup>1</sup>, Gerard C. L. Wong<sup>2,3,4</sup>, Matthew R. Parsek<sup>1</sup>

6 **Affiliations:** <sup>1</sup>Department of Microbiology, University of Washington, Seattle, WA,  
7 USA; <sup>2</sup>Department of Bioengineering, University of California Los Angeles, CA, USA;  
8 <sup>3</sup>Department of Chemistry and Biochemistry, University of California Los Angeles, CA,  
9 USA; <sup>4</sup>California NanoSystems Institute, University of California Los Angeles, CA,  
10 USA; <sup>5</sup>Hefei National Laboratory for Physical Sciences at the Microscale, University of  
11 Science and Technology of China, Hefei 230026, P. R. China; <sup>6</sup>Institute of Synthetic  
12 Biology, Shenzhen Institutes of Advanced Technology, Chinese Academy of Sciences,  
13 Shenzhen, China, P. R. China; <sup>8</sup>School of Life Sciences, University of Nevada Las  
14 Vegas, Las Vegas, Nevada, USA; <sup>9</sup>Department of Pediatrics, University of Washington,  
15 Seattle, WA, USA.

16 **Abstract**

17 The second messenger signaling molecule cyclic diguanylate monophosphate (c-di-GMP)  
18 drives the transition from planktonic to biofilm growth in many bacterial species.  
19 *Pseudomonas aeruginosa* has two surface sensing systems that produce c-di-GMP in  
20 response to surface adherence. The current thinking in the field is that once cells attach to  
21 a surface, they uniformly respond with elevated c-di-GMP. Here, we describe how the  
22 Wsp system generates heterogeneity in surface sensing, resulting in two physiologically  
23 distinct subpopulations of cells. One subpopulation has elevated c-di-GMP and produces

24 biofilm matrix, serving as the founders of initial microcolonies. The other subpopulation  
25 has low c-di-GMP and engages in surface motility, allowing for exploration of the  
26 surface. We also show that this heterogeneity strongly correlates to surface behavior for  
27 descendent cells. Together, our results suggest that after surface attachment, *P.*  
28 *aeruginosa* engages in a division of labor that persists across generations, accelerating  
29 early biofilm formation and surface exploration.

30

31 **Introduction**

32 *Pseudomonas aeruginosa* is an opportunistic pathogen that engages in a range of  
33 surface-associated behaviors and is a model bacterium for studies of surface-associated  
34 communities called biofilms. Biofilms are dense aggregates of cells producing  
35 extracellular matrix components that hold the community together. The biofilm mode of  
36 growth confers cells protection from a variety of environmental stresses including  
37 nutrient limitation, desiccation, and shear forces, as well as engulfment by protozoa in the  
38 environment or phagocytes in a host (1).

39 The secondary messenger signaling molecule cyclic-di-GMP (c-di-GMP) drives  
40 the transition from the planktonic to the biofilm mode of growth. In many bacterial  
41 species, including *P. aeruginosa*, elevated c-di-GMP results in repression of flagellar  
42 motility genes, while promoting expression of genes involved in producing a biofilm  
43 matrix(2). The *P. aeruginosa* biofilm matrix is composed of a combination of  
44 polysaccharides (including Pel and Psl), proteins (including the adhesin CdrA), and  
45 extracellular DNA (3–8). Biofilm matrix production is an energetically costly process  
46 that is regulated at multiple levels (9). The *cdrA*, *pel* and *psl* genes are all  
47 transcriptionally induced under conditions of high c-di-GMP(10).

48 For many species, the initial step in biofilm formation involves adherence of free  
49 swimming planktonic cells to a surface and the initiation of surface sensing. *P.*  
50 *aeruginosa* has at least two distinct surface sensing systems, the Wsp and the Pil-Chp  
51 systems, that when activated, lead to biofilm formation. The Wsp system senses an  
52 unknown surface-related signal (recently proposed to be membrane perturbation (11))  
53 through WspA, a membrane-bound protein homologous to methyl-accepting chemotaxis

54 proteins (MCPs). Activation of this system stimulates phosphorylation of the diguanylate  
55 cyclase WspR, which leads to the formation of aggregates of phosphorylated WspR  
56 (WspR-P) in the form of visible subcellular clusters. This aggregation of WspR-P  
57 potentiates its activity, increasing c-di-GMP synthesis (12). In comparison, the Pil-Chp  
58 chemosensory-like system initiates a hierarchical cascade of second messenger signaling  
59 in response to a surface (13). First, an increase in cellular cAMP levels occurs through  
60 activation of the adenylate cyclase CyaB by the chemotaxis-like Pil-Chp complex. This  
61 increases expression of genes involved in type IV pilus biogenesis, including PilY1.  
62 PilY1 is associated with the type IV pilus and harbors a Von Willebrand motif, which is  
63 involved in mechanosensing in eukaryotic systems(14). Thus, it has been proposed that  
64 this protein may be involved in the mechanosensing of surfaces (15). The output of this  
65 second signal is through the diguanylate cyclase, SadC, resulting in an increase in cellular  
66 c-di-GMP levels. Unlike the Wsp system, which localizes laterally along the cell (16),  
67 PilY1 is required to be associated with polarly-localized type IV pili in order to stimulate  
68 c-di-GMP production (13, 14), suggesting that *P. aeruginosa* deploys both polar and  
69 laterally localized systems to promote c-di-GMP synthesis in response to a surface.

70 Here, we examined the dynamics of c-di-GMP production and bacterial surface  
71 motility at the single-cell level during early stages of biofilm formation. We used a  
72 plasmid-based, transcriptional reporter of intracellular c-di-GMP to follow the  
73 downstream fate of cells producing varying levels of c-di-GMP in response to surface  
74 attachment. Within a clonal population of *P. aeruginosa*, we found that levels of c-di-  
75 GMP vary among individual cells as they sense a surface, leading to a division of labor

76 between two energetically costly behaviors associated with early biofilm formation:  
77 surface exploration and polysaccharide production.

## 78 **Results**

### 79 Cellular c-di-GMP levels rapidly increase upon surface attachment

80 We initially compared levels of c-di-GMP between *P. aeruginosa* PAO1 cells  
81 growing attached to a silicone surface and subjected to constant flow for 4 hours to those  
82 grown planktonically for 4 h. As expected, we observed that PAO1 cellular c-di-GMP  
83 levels are 4.4-fold higher ( $\pm 0.78$  SD,  $N = 3$ ,  $p \leq 0.05$ ) after 4h of growth attached to a  
84 surface compared to planktonic growth (Figure 1A). Because direct measurement of c-di-  
85 GMP by LC-MS/MS is limited by our ability to generate enough biomass at earlier time  
86 points, we used qRT-PCR to monitor *pel* transcript levels as a readout of c-di-GMP. We  
87 found that after just 30 min of surface attachment, *pelA* transcript levels had increased  
88 almost 10-fold compared to planktonically grown cells (Figure 1 – Supplement 1). This is  
89 consistent with previously published literature showing that transcription of the *pel*  
90 operon is directly and positively controlled by high cellular levels of c-di-GMP (17, 18).

### 91 The $P_{cdrA}::gfp$ reporter detects heterogeneity in c-di-GMP during surface sensing

92 Next, we sought to visualize early c-di-GMP signaling events at the single cell  
93 level. To this end we used a plasmid-based, c-di-GMP responsive transcriptional reporter,  
94  $pP_{cdrA}::gfp_{ASV}$  (19) in two commonly-studied *P. aeruginosa* strains, PAO1 and PA14.  
95 Planktonic cells (a condition where the reporter is inactive due to low c-d-GMP levels)  
96 were used to inoculate flow cell chambers. We imaged individual cells of each reporter  
97 strain hourly for up to 6 hours after surface attachment (Figure 1B and Figure 1 –  
98 Supplement 2). As expected, we saw minimal GFP fluorescence at the 0 h time point

99 (right after surface attachment). However, by 1 h, the reporter was activated in a subset of  
100 surface attached cells, as defined by GFP fluorescence greater than twice that of  
101 background levels (referred to as reporter “on” subpopulations). Interestingly, between 4  
102 and 6 h post inoculation, we consistently observed that the c-di-GMP reporter was only  
103 active in a subset of cells in both strains (Figure 1C). In PA14, the reporter was activated  
104 in 10% of the population over 6 h, whereas PAO1 displayed greater reporter activity,  
105 with 40-60% of the cells displaying reporter activity through 12 h (Figure 1 – Supplement  
106 2). We confirmed these results using flow cytometry to assess the proportion of attached  
107 cells that were fluorescent (Figure 1 – Supplement 3D,E). To be sure that the promoter of  
108 *cdrA* is representative of c-di-GMP-regulated gene expression, we replaced  $P_{cdrA}$  with the  
109 promoter of *siaA*, a gene that is also highly expressed under conditions of elevated c-di-  
110 GMP (10, 20). We found that  $pP_{siaA}::gfp_{ASV}$  reporter activity resembled that of  
111  $pP_{cdrA}::gfp_{ASV}$  in response to a surface (Figure 1 – Supplement 4). Thus, reporter activity  
112 is indeed linked to cellular levels of c-di-GMP.

### 113 Cyclic di-GMP heterogeneity leads to phenotypic diversification at early stages of 114 biofilm formation

115 We then wanted to confirm that subpopulations of surface-attached *P. aeruginosa*  
116 cells with high and low c-di-GMP reporter activity are truly physiologically distinct from  
117 one another. We used TRITC-labeled lectins to stain for two c-di-GMP-induced  
118 exopolysaccharides, Psl and Pel (7, 21), the presence of which is indicative of biofilm  
119 formation by PAO1 and PA14, respectively. After 4h of attachment to glass, we  
120 observed an enrichment of TRITC-conjugated lectin staining in the population of cells  
121 with high c-di-GMP reporter activity (Figure 1D and Figure 1 – Supplement 5),

122 demonstrating that the subpopulation of cells with high c-di-GMP is producing more  
123 exopolysaccharide than their low c-di-GMP counterparts. As a complementary approach,  
124 we separated 4 h surface-grown cells of the reporter strain into reporter “on” and “off”  
125 subpopulations using flow-assisted cell sorting (FACS; Figure 1 – Supplement 6). We  
126 then applied qRT-PCR to compare Pel and Psl transcript levels in these two populations.  
127 Both the *pel* and *psl* operon transcripts were elevated in the reporter “on” subpopulation,  
128 relative to the reporter “off” subpopulation (Figure 1E). These data support that, with  
129 respect to c-di-GMP signaling, there are at least two distinct subpopulations that arise  
130 shortly after surface attachment.

### 131 The Wsp system is required for surface sensing

132 We next evaluated the relative contributions of the Wsp and Pil-Chp surface  
133 sensing systems to surface-induced c-di-GMP production. Strains with mutations in the  
134 Pil-Chp chemosensory system were not significantly defective in surface sensing activity.  
135 Deletion of the diguanylate cyclase activated through the Pil-Chp system (PAO1  $\Delta sadC$ )  
136 and the gene encoding the putative sensor PilY1 (PAO1  $\Delta pilY1$ ) did not significantly  
137 influence reporter activity in response to a surface (Figure 2 – Supplement 1A,B).  
138 Whereas both the SadC and PilY1 mutants displayed wild type levels of reporter activity,  
139 a mutant lacking the main Type IV pilus filament protein (PAO1  $\Delta pilA$ ) did show a  
140 statistically significant defect in reporter activity by 6 h (Figure 2 – Supplement 1B;  $p$   
141  $<0.05$  by T-test). We then mutated the c-di-GMP cyclase gene, *wspR*, to inactivate the  
142 Wsp system. In addition, we deleted the gene encoding the methylesterase *wspF*, which  
143 locks the system into the active state, regardless of whether cells are surface-associated.  
144 We found that PAO1  $\Delta wspR$  strain exhibited extremely low levels of reporter activity

145 during the first 6 h after surface attachment (Figure 2A and Figure 2 – Supplement 2).  
146 Complementation of PAO1  $\Delta wspR$  restored wild type levels of activity at all time points  
147 (Figure 2 – Supplement 3). As expected, PAO1  $\Delta wspF$  had a high proportion of reporter  
148 active cells (Figure 2A). We repeated these experiments in the lab strain PA14 and saw a  
149 similar trend for Wsp and Pil-Chp mutants (Figure 2 – Supplement 4).

150         Since the Pil-Chp surface sensing apparatus is polarly localized and the Wsp  
151 system is localized laterally along the length of the cell body, we examined whether  
152 reporter activity correlated with polar versus lateral attachment to the surface. We found  
153 that reporter activity was very low in polarly attached cells, while cells attached along the  
154 entire length of the cell body displayed a higher proportion of activated cells (Figure 2B).  
155 This finding is also consistent with the localization of the Wsp system and its role for  
156 early c-di-GMP signaling during surface sensing.

#### 157 Heterogeneity in c-di-GMP levels among cells correlates with Wsp system activity

158         The specific activity of purified WspR increases as a function of WspR  
159 concentration when the protein is treated with beryllium fluoride to mimic  
160 phosphorylation, supporting the idea that formation of subcellular clusters of WspR-P  
161 potentiates its diguanylate cyclase activity and leads to elevated c-di-GMP(12). Fewer  
162 than 1% of wild-type cells grown in broth have a visible WspR-YFP cluster. However,  
163 after a short period of growth on an agar surface, WspR-YFP clusters were visible in 30-  
164 40% of wild type PAO1 cells, and this is dependent on sensing by the membrane-bound  
165 protein WspA, which is laterally distributed in cells (9). To directly link WspR cluster  
166 formation with diguanylate cyclase activity at the cellular level and with surface sensing,  
167 we constructed a version of the c-di-GMP reporter that expresses mTFP1 instead of GFP



168 (pP<sub>cdrA</sub>::*mTFP1*) to avoid the issue of spectral overlap with WspR-YFP. We monitored  
169 reporter activity in two point mutants of WspR (L170D and E253A) that are driven by an  
170 inducible promoter, translationally fused to eYFP and have been previously shown to  
171 form large subcellular WspR clusters in a higher percentage of cells than wild-type  
172 WspR. The WspR[L170D] protein is highly active for c-di-GMP production, and it forms  
173 subcellular clusters in about 75% of agar surface-grown cells. A WspR[E253A] point  
174 mutation abolishes diguanylate cyclase activity, but this protein still forms clusters in  
175 about 70% of surface-grown cells (12). As expected, in the presence of inducer, we  
176 observed a large increase in c-di-GMP reporter activity in WspR[L170D], but not  
177 WspR[E253A] (Figure 3A, B). We then asked whether the heterogeneity in reporter  
178 activity in response to surface attachment correlates with WspR clustering in the  
179 WspR[L170D] strain. We found that pP<sub>cdrA</sub>::*mTFP1* activity was significantly higher in  
180 cells with at least one subcellular WspR-eYFP focus in the WspR[L170D] strain  
181 compared to cells without a WspR-eYFP focus (Figure 3C; median mTFP1 fluorescence  
182 of 345 vs. 320 RFU respectively, Mann-Whitney test,  $p < 0.001$ ). These data indicate that  
183 the heterogeneity observed in c-di-GMP signaling after surface attachment is due to the  
184 heterogeneity in the activity of the Wsp system, as reflected by subcellular clustering of  
185 active WspR-P.

186 We next asked whether the observed heterogeneity in c-di-GMP signaling in  
187 response to a surface has a meaningful influence on biofilm formation. This was  
188 particularly important since previous published results indicated that a *wspR* mutation  
189 had only a small impact on biofilm production (22). However, these studies assessed  
190 biofilm formation at later stages of biofilm growth that were well beyond initial surface

191 attachment. Therefore, we chose to compare a *wspR* mutant to wild type at earlier  
192 biofilm stages. We performed *in vitro* biofilm assays and observed that a PAO1  $\Delta$ *wspR*  
193 mutant was defective for biofilm formation relative to wild type PAO1 at 2, 4, and 6  
194 hours post-attachment (Figure 4A). However, at later stages of development (~24 h), the  
195 *wspR* mutant caught up and produced similar amounts of biofilm biomass relative to wild  
196 type levels. Complementation of the  $\Delta$ *wspR* strain *in trans* restored wild type levels of  
197 biofilm formation at all time points. These data suggest that the Wsp system rapidly  
198 responds to surface contact to generate elevated levels of c-di-GMP, which accelerates  
199 biofilm production. Given the importance of c-di-GMP signaling in biofilm production,  
200 the fact that the  $\Delta$ *wspR* strain can ultimately attain wild-type levels of biofilm biomass  
201 suggests that one of the many other known c-di-GMP cyclases present in *P. aeruginosa*  
202 may ultimately compensate for c-di-GMP production in the absence of WspR.

203 Cyclic di-GMP heterogeneity leads to diversification in surface exploration at the lineage  
204 level

205 We hypothesized that heterogeneity in c-di-GMP signaling dictated by the Wsp complex  
206 could impact the surface behavior of the two observed subpopulations. We predicted that  
207 the subpopulation of cells with high c-di-GMP after surface attachment would produce  
208 biofilm matrix exopolysaccharides and contribute to initial microcolony formation, while  
209 the cells with low c-di-GMP would exhibit increased surface motility and detachment,  
210 which is known to be inhibited by exopolysaccharide production. To test this hypothesis,  
211 we tracked both reporter activity and surface behavior for cells within a single field of  
212 view for 40 h. From our single-cell tracking data, we generated family trees across at  
213 least four generations of cells, using a previously described technique (23). We tracked

214 the time-averaged  $P_{cdrA::gfp_{ASV}}$  reporter activity ( $I_{c-di-GMP}$ ), surface motility behavior  
215 ( $F_{motile}$ , defined as the fraction of time that cells are motile), and detachment behavior  
216 (tree asymmetry  $\lambda$  where  $\lambda = 0$  represents both daughter cells remaining attached to the  
217 surface and  $\lambda = 1$  represents when one daughter cell detaches or travels outside the field  
218 of view).

219 In *P. aeruginosa*, surface exploration is mainly accomplished by twitching  
220 motility, mediated by type IV pili, and does not appear to be influenced by levels of  
221 intracellular c-di-GMP when analyzing single cells (24). Interestingly, we found that  
222 correlations between c-di-GMP and motility during the lifetime of individual cells are  
223 weak. However, when analyzing entire lineages in family trees rather than individual  
224 cells, we found clear inverse correlations between  $I_{c-di-GMP}$  and  $F_{motile}$  (Figure 4B,  $\rho = -$   
225 0.53,  $p = 0.0012$ ) and between  $I_{c-di-GMP}$  and  $\lambda$  (Figure 4C,  $\rho = -0.45$ ,  $p = 0.0068$ ),  
226 suggesting that c-di-GMP levels is strongly inversely correlated with surface motility  
227 behavior and detachment behavior over multiple generation of cells. To illustrate these  
228 correlations, we chose three representative families, with either high, intermediate, or low  
229  $I_{c-di-GMP}$  and plotted their family trees (Figure 4D) and spatial trajectories (Figure 4E).  
230 Families with the highest  $I_{c-di-GMP}$  had the lowest  $F_{motile}$  and  $\lambda$  (Family 1, Figure 4B-E).  
231 In these families, daughter cells remained attached following cell division, exhibited  
232 continuously elevated c-di-GMP, did not move appreciable distances on the surface, and  
233 ultimately produced small microcolonies. In contrast, families of cells with low  $I_{c-di-GMP}$   
234 had the highest  $F_{motile}$  and  $\lambda$ . For these families, daughter cells frequently detached or  
235 traveled outside the field of view, had lower c-di-GMP levels, traveled larger distances  
236 on the surface, and ultimately did not form microcolonies (Family 3, Figure 4B-E).

237           One important question is what happens to early biofilm development if we were  
238 to effectively remove heterogeneity in c-diGMP output rooted in the WspR surface  
239 sensing system. To address this question, we used a strain in which c-di-GMP production  
240 could be easily controlled using an optogenetic system. The precise control of c-di-GMP  
241 expression in individual cells was made possible by the use of a chimeric protein that  
242 fused a diguanylate cyclase domain to a bacteriophytochrome domain. Flow chambers  
243 were seeded with the optogenetic strain encoding a heme oxygenase (*bphO*) and light-  
244 responsive diguanylate cyclase (*bphS*)(25). Initially, cells attached on the glass surface  
245 were tracked and continuously stimulated with red-light over ~8 h using adaptive  
246 tracking illumination microscopy (ATIM), which allows for precise stimulation of the  
247 initial attached cells and their offspring and ensures sustained intracellular c-di-GMP  
248 production for a fixed number of surface cell generations (Figure 5 – Supplement 1).  
249 Cellular lineages (a cell and all of its offspring) and c-di-GMP expressions were  
250 continually monitored for at least 12 h. Families that were not stimulated with light  
251 demonstrated a heterogeneous surface response (Figure 5B,D) similar to that of Families  
252 1-3 in Figure 4B-E. Some lineages were dominated by surface explorers, whereas others  
253 were seen to commit to microcolony formation. In contrast, in families stimulated with  
254 light for more than 1 generation, the resulting c-di-GMP production artificially forced  
255 lineages to have low surface motility and commit to microcolony production (Figure  
256 5A,C) similar to that of Family 1 in Figure 4B-E. Families stimulated with light in this  
257 manner had higher  $I_{c-di-GMP}$  and lower  $\lambda$  values than those that were not stimulated (Figure  
258 5 – Supplement 2). We also found that optogenetic control of c-di-GMP results in  
259 phenotypes that are consistent with the wild-type behavior presented in Figure 4, with

260 illuminated cells (high c-di-GMP) displaying the least motility and control (non-  
261 illuminated) displaying comparatively greater surface motility (Figure 5 – Supplement 2).  
262 Interestingly, families stimulated with light for 1 generation or less are not significantly  
263 different from un-illuminated controls (data not shown). Our data show that the  
264 generation of c-di-GMP can deterministically lead to the creation of an entire lineage of  
265 sessile cells with post-division surface persistence, low motility, and initiation of  
266 microcolony formation. Altogether, these results show that c-di-GMP levels, surface  
267 motility, and detachment are inversely correlated at the lineage level, and that the time  
268 scale for this occurs over multiple generations.

## 269 **Discussion**

270 Collectively, our data show that heterogeneity in cellular levels of c-di-GMP,  
271 generated by the Wsp system in response to surface sensing, leads to two distinct  
272 physiological subpopulations. Phenotypic heterogeneity of single cells is a common  
273 phenomenon in bacteria that is thought to be beneficial at the population level by  
274 allowing a single genotype to survive sudden environmental changes and by promoting a  
275 division of labor between costly behaviors that support the growth and survival of the  
276 population (26). Sources of phenotypic heterogeneity include bistability (27) and  
277 stochasticity (28) of gene expression, unequal partitioning of proteins during cell division  
278 due to low abundance (28), epigenetic modifications resulting in phase variation (29), or  
279 through asymmetrical cell division (30, 31). In this study, we show that the Wsp system  
280 generates heterogeneity in c-di-GMP signaling, and it is never fully activated in 100% of  
281 wild-type, surface-attached cells. Moreover, we show that such heterogeneity results in  
282 phenotypic changes for entire family lineages of descendent cells. It is interesting that

283 correlations between c-di-GMP, surface motility, and surface detachment probability are  
284 strong when considered for an entire lineage in a bacterial family tree, but weak when  
285 considered at the individual cell level. This form of correlation suggests that the  
286 enforcement of surface sensing outcomes (ex: the activation of DGCs, attenuation of  
287 motility) is slow compared to the cells' division times, and that c-di-GMP signaling is  
288 propagated across multiple generations. Additionally, proteins such as DGCs activated  
289 by surface sensing may not be passed down to daughter cells equally after division,  
290 especially if their number is not large or if they are assymmetrically partitioned, which may  
291 be one mechanism that leads to the heterogeneity in c-di-GMP levels.

292       If we overwhelm WspR-generated c-di-GMP heterogeneity by using  
293 optogenetically-induced sustained c-di-GMP production, we find that phenotypic  
294 heterogeneity is lost, and that illuminated cells deterministically become sessile and form  
295 microcolonies. Interestingly, our optogenetic experiments show that sustained c-di-GMP  
296 production for more than one generation is required before commitment to the sessile  
297 lifestyle. This observation is consistent with the fact that we see strong correlations  
298 between c-di-GMP levels and motility behavior at the lineage level and not at the  
299 individual cell level. Moreover, since the WspR surface sensing system generates  
300 heterogeneous c-di-GMP levels, this requirement of sustained c-di-GMP production for  
301 more than one generation is inherently difficult for wild-type cells to meet, and virtually  
302 guarantees the simultaneous existence of motile and sessile subpopulations. This  
303 phenotypic heterogeneity, which has been 'hardwired' into the structure of c-di-GMP  
304 surface sensing networks, allows for a division of the labor during early biofilm  
305 formation, with one subpopulation committing to initiating the protective biofilm

306 lifestyle, while the other subpopulation is free to explore the surface and potentially

307 colonize distant, perhaps more favorable, locations.

308

## 309 **Materials and Methods**

### 310 **Bacterial strains and growth conditions**

311 The strains, plasmids, and primers used in this study are listed in Table 1. *Escherichia*  
312 *coli* and *P. aeruginosa* strains were routinely grown in Luria–Bertani (LB) medium and  
313 on LB agar at 37°C. For the flow cell experiments, *P. aeruginosa* was grown in either LB  
314 or FAB minimal medium supplemented with 10mM or 0.6mM glutamate at room  
315 temperature (7). For flow cytometry experiments, *P. aeruginosa* was grown in either LB  
316 medium or in Jensen’s defined medium with glucose as the carbon source (21). For the  
317 tube biofilm and c-di-GMP measurements, *P. aeruginosa* strains were grown in Vogel-  
318 Bonner Minimal Medium (VBMM; (32)). Antibiotics were supplied where necessary at  
319 the following concentrations: for *E. coli*, 100 µg/mL ampicillin, 10 µg/mL gentamicin,  
320 and 10 or 60 µg/mL tetracycline; for *P. aeruginosa*, 300 µg/mL carbenicillin, 100 µg/mL  
321 gentamicin, and 100 µg/mL tetracycline.  $P_{cdrA}::gfp_{ASV}$  reporter and vector control  
322 plasmids were selected with 100 µg/mL gentamicin for *P. aeruginosa* strains and 10  
323 µg/mL gentamicin for *E. coli*.

324 PAO1  $\Delta pilY1$  was constructed using two-step allelic exchange following  
325 conjugation of wild type PAO1 with *E. coli* S17.1 harboring pENTRPEX18Gm:: $\Delta pilY1$   
326 (a gift from Joe Harrison) as previously described (33). PAO1  $\Delta pilY1$  was identified by  
327 colony PCR using primers PAO1pilY1-SEQ-F and PAO1pilY1-SEQ-R. PAO1  $\Delta dipA$   
328 was constructed similarly by conjugation of wild type PAO1 with *E. coli* S17.1 harboring  
329 pENTRPEX18Gm:: $\Delta dipA$  (a gift from Joe Harrison). PAO1  $\Delta dipA$  was identified by  
330 colony PCR using primers PAO1dipA-SEQ-F and PAO1dipA-SEQ-R. PA14  $\Delta wspR$  and



331  $\Delta$ wspF deletion mutants were confirmed by PCR using primers PA14wspR-SEQ-F and  
332 PA14wspR-SEQ-R or PA14wspF-SEQ-F and PA14wspF-SEQ-R, respectively.

333 To create MPAO1 attTn7::P(A1/04/03)::GFPmut, the miniTn7 from pBT270 was  
334 integrated into the chromosome of *P. aeruginosa* PAO1 with the helper plasmid pTNS2,  
335 as previously described (34). pBT270 was created by introducing the constitutive  
336 A1/04/03 promoter (35) and removing the trc promoter from pBT223 using the  
337 QuikChange Lightning Kit (Agilent Technologies) and the oligonucleotides OBT314 and  
338 OBT315. pBT223 was constructed via recombineering of pBT200, pUC18-miniTn7T2-  
339 Gm-GW, and pBT212 using Multisite Gateway technology (Invitrogen). pBT212 was  
340 constructed by cloning the *gfpmut3* from AKN66 using OBT268 and OBT269, and  
341 recombining the PCR product with pDONR221 P1-P5r.

#### 342 Construction of optogenetic, c-di-GMP reporter strain in *P. aeruginosa*.

343 Chromosomal insertion of *bphS* was achieved using the mini-CTX system and these  
344 strains were marked with different fluorescent proteins by mini-Tn7 site-specific  
345 transposition essentially as previously described (34, 36). First, a *bphS* fragment obtained  
346 from the plasmid pIND4 was cloned into the vector mini-CTX2 with the *PAI/04/03*  
347 promoter upstream of the MCS via a two-piece ligation. The constructed plasmid was  
348 electroporated into PAO1 and the corresponding recombinant strain was identified by  
349 screening on LB agar plates containing 1mM IPTG and 100  $\mu$ g/mL tetracycline. Then,  
350 the strains were electroporated with a pFLP2 plasmid and distinguished on LB agar plates  
351 containing 5% (w/v) sucrose for the excision of the resistance marker. The c-di-GMP  
352 reporter plasmid and mCherry/EGFP marked *bphS* mutants were constructed as described

353 above. The c-di-GMP reporter plasmid ( $P_{cdrA}::gfp_{ASV}$ ) was electroporated into the  
354 mCherry marked *bphS* mutant to monitor the intracellular c-di-GMP level.

#### 355 Cyclic di-GMP measurement and qRT-PCR of tube biofilms

356 Measurement of c-di-GMP in tube biofilm cells was performed as previously described  
357 (4). Transcriptional analysis of PelA expression in tube biofilms was performed as  
358 described in the “FACS and qRT-PCR of c-di-GMP reporter cells” section.

#### 359 Crystal violet attachment assays

360 Crystal violet assays were performed essentially as previously described to measure  
361 biofilm biomass, except using gentle washing after 2-6 hours of static incubation (8). To  
362 measure biofilm biomass at 24 hours, the crystal violet assay was performed as  
363 previously described without gentle washing (37).

#### 364 Flow cell time course experiments and confocal microscopy

365 *P. aeruginosa* cells harboring the  $pP_{cdrA}::gfp_{ASV}$  reporter plasmid or a promoterless vector  
366 control (pMH489) were grown to mid-log in LB with 100  $\mu\text{g}/\text{mL}$  gentamicin (Gm100)  
367 from LB Gm100 plates or from FAB + 10mM glutamate overnight broth cultures in FAB  
368 + 10mM glutamate. Mid-log cells were back diluted into 1% LB or FAB + 0.6mM  
369 glutamate and flow chambers were inoculated at a final  $\text{OD}_{600}$  0.1 and inverted for 10  
370 minutes to allow cells to attach before induction of flow. Clean media was used to wash  
371 non-attached cells by flow at 40mL per hour for 20 minutes. Flow was then reduced to a  
372 final constant flow rate of 3mL per hour and bacteria were imaged immediately on a  
373 Zeiss LSM 510 scanning confocal laser microscope ( $t=0\text{h}$ ). Flow cells were incubated at  
374 a constant flow rate at room temperature and imaged hourly for up to 24 hours. For every  
375 strain and time point, 5 fields of view and a minimum of 300 cells were captured using

376 identical microscope settings to image GFP fluorescence across all experiments. Images  
377 were analyzed using using Volocity software (Improvision, Coventry, UK). Cells were  
378 counted as pP<sub>cdrA</sub>::*gfp*<sub>ASV</sub> reporter “on” if their mean GFP fluorescence intensity per pixel  
379 was greater than two-fold above the background GFP fluorescence intensity  
380 (approximately 340). Data are presented in terms of the percentage of cells with an  
381 average GFP fluorescence per pixel twofold more intense compared to the background  
382 (pP<sub>cdrA</sub>::*gfp*<sub>ASV</sub> reporter “on”). Microscopy images were artificially colored to display  
383 GFP fluorescence as green.

#### 384 Construction of pP<sub>siaA</sub>::*gfp*

385 A region 259 bp upstream through 21 bp into the coding sequence of *siaA* was amplified  
386 from PAO1 genomic DNA using primers BamH1-Psia-F and SiaA-BamH1-R, then gel  
387 purified using a QIAquick gel extraction kit (Qiagen, Hilden, Germany) digested with  
388 BamH1, then column purified with a QIAquick PCR purification kit (Qiagen, Hilden,  
389 Germany) to remove BamH1. The GFP expression vector pMH487, which contains the  
390 *gfp*<sub>mut3</sub> gene with an RNase III splice site and lacking a promoter (38), was digested  
391 with BamH1, treated with Antarctic phosphatase (New England Biolabs, Ipswich, MA),  
392 then column purified with a QIAquick PCR purification kit (Qiagen, Hilden, Germany) to  
393 remove BamH1. The *PsiaA* allele was ligated into digested pMH487, then transformed  
394 into *E. coli* DH5 $\alpha$ , purified, and sequenced using primer M13F(-21) (Genewiz). The  
395 reporter pP<sub>siaA</sub>::*gfp* was electroporated into *P. aeruginosa* as previously described and  
396 maintained under gentamycin selection at 100  $\mu$ g/mL.

#### 397 Multi-generation single cell tracking of type IV motility and c-di-GMP reporter activity

398 Wild type PAO1 harboring the  $pP_{cdrA}::gfp_{ASV}$  reporter was grown shaking for 20  
399 hours in FAB media with 6mM glutamate. The flow cell inoculum was prepared by  
400 diluting the culture to a final  $OD_{600}$  of 0.01 in FAB with 0.6mM glutamate. The flow cell  
401 inoculum was injected into the flow cell (Department of Systems Biology, Technical  
402 University of Denmark) and allowed to incubate for 10 minutes at 30°C prior to flushing  
403 with media at 30mL/h for 10 minutes. Experiments were performed under a flow rate of  
404 3mL/hour for a total of 40 hours.

405 Images were acquired with an Olympus IX81 microscope equipped with a Zero  
406 Drift Correction autofocus system, a 100× oil objective with a 2× multipler lens, and an  
407 Andor iXon EMCCD camera using Andor IQ software. Bright-field images were  
408 recorded every 3 seconds and GFP fluorescence every 15 minutes. Acquisition continued  
409 for a total recording time of 40 hours, which resulted in approximately 48000 bright-field  
410 images, and 160 fluorescence images.

411 Images were analyzed in MATLAB to track bacterial family trees, GFP  
412 fluorescence, and surface motility essentially as previously described(23) with the  
413 following modifications. Image analysis, family tracking and manual validation, family  
414 tree plotting, and tree asymmetry  $\lambda$  calculations were performed as previously  
415 described(23) without modification. GFP fluorescence intensities were normalized by  
416 calculating the distribution of intensities per cell per frame (extracted by using the binary  
417 image as a mask) and then setting the minimum and maximum intensities to the 1<sup>st</sup> and  
418 99<sup>th</sup> percentiles of this distribution for each dataset.  $I_{c-di-GMP}$  (relative normalized c-di-  
419 GMP reporter intensity) was calculated by averaging the normalized fluorescence  
420 intensities across all members of a family.  $F_{motile}$  (fraction of time that cells in a family

421 are motile) was calculated as follows. For each family, every cell trajectory in the family  
422 was divided into time intervals. For each time interval, presence or absence of motility  
423 was determined using a combination of metrics, including Mean Squared Displacement  
424 (MSD) slope, radius of gyration, and visit map. MSD slope quantifies the directionality  
425 of movement relative to diffusion. Radius of gyration and visit map are different metrics  
426 for quantifying the average distance traveled on the surface.  $F_{\text{motile}}$  was then calculated by  
427 the fraction of these time intervals that have motility. This calculation was modified from  
428 the “TFP activity metric” previously described(23).

#### 429 Setup of Adaptive Tracking Illumination Microscopy

430 Figure 5 – Supplement 1 shows a schematic of the Adaptive Tracking Illumination  
431 Microscopy (ATIM) setup. An inverted fluorescent microscope (Olympus, IX71) was  
432 modified to build the ATIM. The modification includes: 1) a commercial DMD-based LED  
433 projector (Gimi Z3) was used to replace the original bright-field light source, in which the  
434 original lenses in the projector were removed and three-colored (RGB) LEDs were rewired  
435 to connect to an external LED driver (ThorLabs) controlled by a single chip microcomputer  
436 (Arduino UNO r3); 2) the original bright-field condenser was replaced with an air objective  
437 (40× NA = 0.6, Leica); and 3) an additional 850 nm LED light (ThorLabs) was coupled to  
438 the illumination optical path using a dichroic mirror (Semrock) for the bright-field  
439 illumination. Note that 850 nm LED light is safe light to ensure that the bright-field  
440 illumination does not affect optogenetic manipulation. The inverted fluorescent  
441 microscope (Olympus, IX71) equipped with a 100×oil objective and a sCMOS camera  
442 (Zyla 4.2 Andor) was used to collect bright-field images with 0.2 frame rate. The bright-  
443 field images were further analyzed to track multiple single cells in real time using a high-

444 throughput bacterial tracking algorithm coded by Matlab. The projected contours of  
445 selected single cells were sent to the DMD ( $1280 \times 760$  pixels) that directly controlled by  
446 a commercial desktop through a VGA port. The manipulation lights were generated by the  
447 red-color LED (640 nm), and were projected on the single selected cells in real time  
448 through the DMD, a multi-band pass filter (446/532/646, Semrock) and the air objective.  
449 Our results indicated that feedback illuminations could generate projected patterns to  
450 exactly follow the cell movement (Figure 5 – Supplemental 1B) or single cells divisions  
451 (Figure 5 – Supplemental 1C) in real time.

#### 452 Manipulation of c-di-GMP expression in single initial-attached cells

453 The bacterial strain PAO1-*bphS-PcdrA*-GFP-mCherry was inoculated into a flow cell  
454 (Denmark Technical University) and continuously cultured at  $30.0 \pm 0.1^\circ\text{C}$  by flowing  
455 FAB medium (3.0 mL/h). The flow cell was modified by punching a hole with a 5 mm  
456 diameter into the channel, and the hole was sealed by a coverslip that allows the  
457 manipulation light to pass through. An inverted fluorescent microscope (Olympus, IX71)  
458 equipped with a 100 $\times$  oil objective and a sCMOS camera (Zyla 4.2 Andor) was used to  
459 collect bright field or fluorescent images with 0.2 or 1/1800 frame rate respectively. The  
460 power density of the manipulation lights was determined by measuring the power at the  
461 outlet of the air objective using a power meter (Newport 842-PE). GFP or mCherry was  
462 excited using a 480 nm or 565 nm LED lights (ThorLabs) and imaged using single-band  
463 emission filters (Semrock): GFP (520/28 nm) or mCherry (631/36 nm). Initial-attached  
464 cells were selected to be manipulated using ATIM with the illumination at  $0.05 \text{ mW/cm}^2$ ,  
465 which allowed us to compare the results arising from illuminated or un-illuminated

466 mobile cells in one experiment. The c-di-GMP levels in single cells were gauged using  
467 the ratio of GFP and mCherry intensities.

#### 468 Lectin staining and flow cytometry

469 Glass culture tubes were inoculated with 1mL of *P. aeruginosa* in LB or Jensen's  
470 minimal media at an OD<sub>600</sub> 0.8 and incubated statically at 37°C for 4 hours. Non-adhered  
471 cells were removed by washing three times with 2mL sterile phosphate buffered saline  
472 (PBS). Biofilm cells were harvested by vortexing in 1mL PBS with fluorescein-labeled  
473 lectins (WFL lectin (100 µg/mL; Vector Laboratories) for Pel, TRITC-labeled HHA (100  
474 µg/mL; EY Laboratories) for Psl) and incubated on ice for 5 minutes. Cells were washed  
475 3 times to remove non-adhered lectin, resuspended in PBS, and immediately analyzed for  
476 GFP and TRITC fluorescence on a BD LSRII flow cytometer (BD Biosciences). Events  
477 were gated based on forward and side scatter to remove particles smaller than a single *P.*  
478 *aeruginosa* cell and large aggregates.

479 We used PAO1 cells that did not express GFP (wild type PAO1; Figure 1 –  
480 Supplement 3A) or constitutively expressed GFP (PAO1 Tn7::P(A1/04/03)::GFPmut;  
481 Figure 1 – Supplement 3B) to define a gate for high GFP fluorescence. We validated this  
482 gate using a strain in which we expect very high levels of reporter activity (surface grown  
483 PAO1  $\Delta wspF\Delta pelA\Delta pslBCD$  harboring pPcdrA::gfp<sub>ASV</sub>) and saw that 91.6% of cells had  
484 high GFP levels (Figure 1 – Supplement 3C), in agreement with our flow cell  
485 characterization of this strain (Figure 2A). We determined gating for TRITC using cells  
486 that had not been stained with TRITC-conjugated lectin (Figure 1 – Supplement 5A), as  
487 well as two strains that overproduced either Psl (Figure 1 – Supplement 5B) or Pel  
488 (Figure 1 – Supplement 5C) that were stained with the appropriate TRITC-conjugated

489 lectin. Our flow cytometry gating procedure accurately gated 99.7% of wild type PAO1  
490 cells (without the *PcdrA* reporter or lectin-staining) as low GFP and low TRITC (Figure 1  
491 – Supplement 5D).

#### 492 FACS and qRT-PCR of c-di-GMP reporter cells

493 Static biofilm reporter cells were grown as described above and harvested without  
494 lectin staining. Cells were fixed with 6% paraformaldehyde for 20 minutes on ice, then  
495 rinsed once with sterile PBS prior to analysis with a FACSAriaII (BD Biosciences, San  
496 Jose, CA). Events were gated first to remove debris and large cellular aggregates, and  
497 then gated into cells with low and high GFP fluorescence intensity. The low GFP gate  
498 was drawn using wild type PAO1 cells without the *gfp* gene (Figure 1 – Supplement 6A)  
499 and the high GFP gate was drawn using both PAO1 Tn7::P(A1/04/03)::GFPmut (Figure 1  
500 – Supplement 6B) and PAO1  $\Delta wspF \Delta pelA \Delta pslBCD P_{cdrA}::gfp_{ASV}$  reporter (Figure 1 –  
501 Supplement 6C). As expected, wild type PAO1  $pP_{cdrA}::gfp_{ASV}$  reporter cells that had been  
502 harvested after 4 hours of surface attachment to glass in static LB liquid culture displayed  
503 subpopulations of high GFP, reporter “on” cells (30.8% of the population) and “off”  
504 (57.2%) cells (Figure 1 – Supplement 6D), whereas this same strain grown to mid-log  
505 planktonically in LB displayed mostly reporter “off” cells (Figure 1 – Supplement 6E).  
506 Cells were sorted at 4°C by flow assisted cell sorting (FACS) to collect 100,000 events  
507 into TRIzol LS (Thermo Fisher Scientific, Waltham, MA). RNA was extracted from  
508 sorted cells by boiling immediately for 10 minutes and following the manufacturer’s  
509 instructions for RNA isolation. DNA was digested by treating with RQ1 Dnase I  
510 (Promega, Madison, WI) and samples were checked for genomic DNA contamination by  
511 PCR to detect *rplU*. Expression of *pelA*, *pslA*, and *ampR* was measured by quantitative



512 Reverse Transcriptase PCR (qRT-PCR) using the iTaq Universal SYBR Green One-Step  
513 kit (Biorad, Hercules, CA) and a CFX96 Touch Real-Time PCR detection system (Bio-  
514 Rad, Hercules, CA). The  $\Delta\Delta C_q$  was calculated for 3 independent samples of sorted wild  
515 type PAO1  $P_{cdrA}::gfp_{ASV}$  reporter biofilm cell populations by normalizing PelA and PslA  
516 to relative levels of AmpR expression. Data were presented as the average fold change in  
517 PelA or PslA expression in the  $P_{cdrA}::gfp_{ASV}$  sorted “on” population (high GFP) relative to  
518 the “off” population (low GFP) for the three biological replicates.

#### 519 WspR-YFP foci and $pP_{cdrA}::mTFP1$ reporter

520 A version of the  $pP_{cdrA}$  reporter was constructed in the pBBR1MCS5 plasmid to express  
521 mTFP1 instead of GFP, for use with YFP-tagged WspR proteins. The  $P_{cdrA}$  promoter  
522 and an enhanced ribosomal binding site from the gene 10 leader sequence of the T7  
523 phage (g10L) was amplified from pUC18-miniTn7T2- $P_{cdrA}$ -RBSg10L- $gfp_{AGA}$  using  
524 primers SacI- $P_{cdrA}$ -F and SOE- $P_{cdrA}$ -RBSg10L-R. The primers mTFP1-F and KpnI-  
525 mTFP1-R were used to amplify the mTFP1 gene from plasmid pNCS-mTFP1 (Allele  
526 Biotech, San Diego, CA). The  $P_{cdrA}::RBSg10L::mTFP1$  allele was constructed by SOE-  
527 PCR using primers SacI- $P_{cdrA}$ -F and KpnI-mTFP1-R, then pBBR1MCS5 and the SOE  
528 PCR product were doubly digested with SacI/KpnI. Digested pBBR1MCS5 was treated  
529 with Antarctic phosphatase, then both digests were gel purified and ligated. The ligation  
530 was transformed into *E. coli* DH5 $\alpha$ , and plasmid from clones growing on LB with 10  
531  $\mu\text{g}/\text{mL}$  gentamycin were sequenced with primers M13F and M13F(-21) (GeneWiz).  
532 Fluorescence of the  $pP_{cdrA}::mTFP1$  reporter was measured in Wsp mutants in a  
533 fluorimeter (BioTek Synergy H1 Hybrid Reader, BioTek Instruments, Inc., Winooski,  
534 VT, USA) and in flow cells to confirm its activity resembled that of  $pP_{cdrA}::gfp_{ASV}$ . The

535 pPcdrA::mTFP1 reporter was electroporated into *P. aeruginosa* strains with the native  
536 WspR deleted and harboring an arabinose-inducible copy of WspR-YFP on its  
537 chromosome (12). Cells were grown on LB agar plates with 100 µg/mL gentamycin and  
538 1% arabinose for 10 hours, then transferred to an agar pad for imaging. WspR-YFP foci  
539 and mTFP1 fluorescence was imaged using a Nikon Ti-E inverted wide-field  
540 fluorescence microscope with a large-format scientific complementary metal-oxide  
541 semiconductor camera (sCMOS; NEO, Andor Technology, Belfast, United Kingdom)  
542 and controlled by NIS-Elements. WspR-YFP foci were detected as previously described  
543 (12).

544

545 **Acknowledgements:** We thank Drs. Julie Cass and Paul Wiggins providing the wide-  
546 field microscope and CMOS camera to image WspR-eYFP clusters, Drs. Joe J. Harrison  
547 and Yasuhiko Irie for the gift of bacterial strains, and Dr. Keiji Murakami for performing  
548 c-di-GMP measurements.

549

550

551 Figures

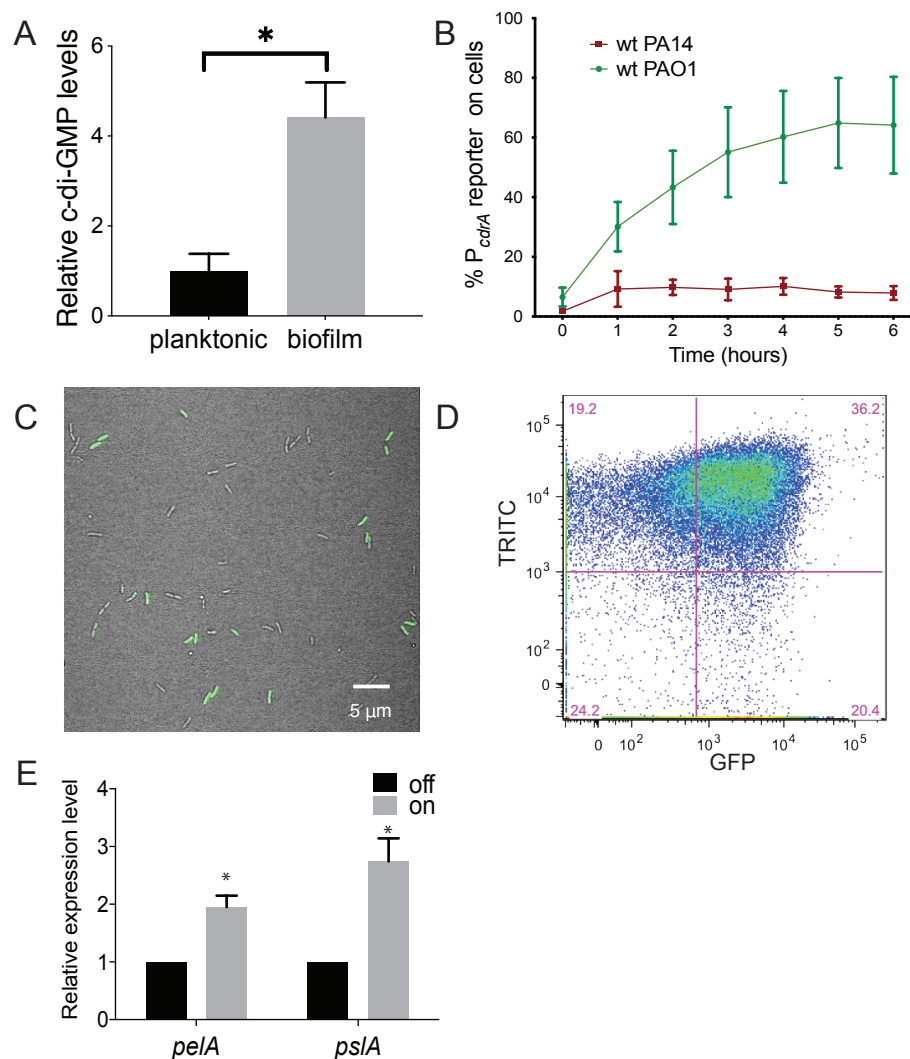

552

553 **Figure 1. Heterogeneity in cellular levels of c-di-GMP during early *P. aeruginosa***

554 **biofilm formation**

555 (A) c-di-GMP levels are elevated rapidly upon association of *P. aeruginosa* PAO1 cells

556 with a surface. Relative levels of intracellular c-di-GMP in wild type PAO1 cells grown

557 either planktonically or after 4 h of attachment to a silicone tube. Values are normalized

558 to the average concentration of c-di-GMP in planktonic cells, in pmol c-di-GMP/mg total

559 protein as determined by LC-MS/MS, and presented as mean and SD. \*  $p < 0.05$  by T-  
560 test,  $N = 3$ . Figure 1 – Figure supplement 1 shows the Pel polysaccharide operon is  
561 transcriptionally activated almost 10-fold compared to planktonic cells within 30 minutes  
562 of surface attachment.

563 (B) Two commonly studied *P. aeruginosa* lab strains, PAO1 and PA14, differentially  
564 activate the c-di-GMP reporter during surface sensing. Wild type PAO1 or PA14 cells  
565 harboring the c-di-GMP reporter ( $P_{cdrA}::gfp_{ASV}$ ) were grown to mid-log phase in  
566 planktonic culture, then inoculated into a flow cell and supplied with 1% LB medium.  
567 Surface attached cells were imaged immediately after inoculation (time 0 h), and hourly  
568 for 12 hours. The c-di-GMP reporter is activated in a subset of wild type PAO1 cells  
569 within 1 hour of surface attachment and remains activated in approximately 60% of  
570 PAO1 cells during the first 6 hours of attachment. In PA14, the c-di-GMP reporter is  
571 activated in a smaller proportion of attached cells compared to PAO1. Data points are  
572 mean percentage of reporter activated cells from each time point across at least 3  
573 biological replicates, with standard deviation. Figure 1 – Supplement 4 shows an  
574 additional c-di-GMP responsive transcriptional reporter (using the *siaA* promoter) is also  
575 responsive to Wsp-dependent changes in cellular levels of c-di-GMP.

576 (C) Wild type PAO1 cells display heterogeneity in c-di-GMP reporter activity after 6  
577 hours of surface attachment. Confocal microscopy image of wild type PAO1  $P_{cdrA}::gfp_{ASV}$   
578 grown in 1% LB after 6 hours of surface attachment during a time course flow cell  
579 experiment. Bright field (grey) and GFP (green) channels are merged. Wild type PAO1  
580  $P_{cdrA}::gfp_{ASV}$  was grown in 1% LB and imaged by CSLM. Figure 1 – Figure supplement 2  
581 shows additional representative timecourse images of PAO1.

582 (D) Psl exopolysaccharide production is enriched in the population of cells with high c-  
583 di-GMP. Representative scatterplot of reporter activity versus Psl lectin binding in wild  
584 type PAO1 harboring the  $pP_{cdrA}::gfp_{ASV}$  reporter grown for four hours in LB before  
585 surface attached cells were harvested, stained with the lectin, washed, and counted by  
586 flow cytometry.

587 (E) Subpopulations of PAO1 cells with high and low c-di-GMP reporter activity are  
588 physiologically distinct. Cells with higher c-di-GMP reporter activity have increased  
589 expression of Pel and Psl biosynthetic machinery genes. After 4 hours of attachment to  
590 glass, wild type PAO1 cells were separated by flow-assisted cell sorting (FACS) into a  
591 population of cells with high (on) and low (off) c-di-GMP reporter activity, then qRT-  
592 PCR was performed to quantify expression of Pel and Psl exopolysaccharide biosynthesis  
593 genes. Levels of expression of Pel or Psl mRNA were normalized to the off population. \*  
594  $p < 0.05$  by T-test, N= 3 biological replicates. Figure 1 – Figure supplement 3 shows  
595 controls for validating the protocol to monitor  $pP_{cdrA}::gfp_{ASV}$  by flow cytometry. Figure 1  
596 – Supplement 5 shows by flow cytometry that Psl and Pel polysaccharide production is  
597 highest in cells with high  $pP_{cdrA}::gfp_{ASV}$  reporter activity.

598 **Figure 1 – Figure supplement 1.** The c-di-GMP-regulated promoter of the Pel  
599 polysaccharide operon is transcriptionally activated almost 10-fold compared to  
600 planktonic cells within 30 minutes of attachment of PAO1 to a silicone tube. qRT-PCR  
601 was performed to detect *pelA* transcript levels in silicone tube biofilm cells compared to  
602 planktonic cells (red). Biofilm transcript levels were normalized to planktonic levels at  
603 each time point. Colony forming units (CFU) of biofilm attached cells is plotted in  
604 yellow at each time point.

605 **Figure 1 – Figure supplement 2.** Representative time course images showing the c-di-  
606 GMP reporter ( $P_{cdrA}::gfp_{ASV}$ ) transitioning from inactive upon initial attachment of wild  
607 type PAO1 (0 hr) to active in a subpopulation of cells between 1 and 12 hours during a  
608 flow cell experiment. A strain harboring the vector control, which encoded  $gfp_{ASV}$ , but  
609 lacks the  $P_{cdrA}$  promoter was imaged alongside each reporter strain (in the appropriate  
610 genetic background) to confirm that GFP fluorescence was not due to random expression  
611 from the plasmid. Wild type PAO1  $P_{cdrA}::gfp_{ASV}$  was grown in 1% LB and imaged by  
612 CSLM. bf = bright field, merge = bright field and GFP channels combined.

613 **Figure 1 – Figure supplement 3.** Development of a protocol to monitor  $pP_{cdrA}::gfp_{ASV}$   
614 using an LSRII flow cytometer. Brackets indicate gates for “on” (GFP above  $1.7 \times 10^2$   
615 RFU) or “off” (GFP below  $1.7 \times 10^2$  RFU) reporter cells and the number above the  
616 bracket indicates the percentage of cells that fall within that gate. a) Wild type PAO1  
617 cells were used to determine the background level of fluorescence on the BD Aria III for  
618 GFP measurements. The population of cells falls below  $10^3$  RFU. b) A *P. aeruginosa*  
619 strain constitutively expressing stable GFP (PAO1 Tn7::P(A1/04/03)::GFPmut) was used  
620 to determine gating for cells with high GFP, with the population ranging from  $10^3$  to  $10^5$   
621 RFU. c) Surface grown PAO1  $\Delta wspF\Delta pel\Delta psI$  harboring the  $pP_{cdrA}::gfp_{ASV}$  was used to  
622 validate the gate for collection of cells with high reporter activity ( $10^3$  to  $10^5$  RFU; 91.6%  
623 of the population). d) Example of gating for reporter “on” cells from wild type PAO1  
624  $pP_{cdrA}::gfp_{ASV}$  cells that had been attached to glass in LB medium for 4 hours.  
625 Approximately 56.6% of the population falls into the reporter “on” population. e)  
626 Example of gating for “on” cells from wild type PA14  $pP_{cdrA}::gfp_{ASV}$  cells that had been  
627 attached to glass in LB medium for 4 hours prior to FACS sorting. Approximately 12.8%

628 of the population falls into the reporter “on” population. f) Example of gating for “on”  
629 cells from wild type PA14 pP<sub>cdrA</sub>::gfp<sub>ASV</sub> cells that had been attached to glass in Jensen’s  
630 media (a condition in which Pel is more abundantly produced than in LB) for 4 hours.  
631 Approximately 31.9% of the population falls into the reporter “on” population.  
632 **Figure 1 – Supplement 4.** The *siaA* promoter, regulated by elevated c-di-GMP/FleQ is  
633 responsive to Wsp-dependent changes in cellular levels of c-di-GMP. Wild type PAO1  
634 and PAO1 mutants harboring the pP<sub>siaA</sub>::gfp reporter were grown for 20 hours on an LB  
635 agar surface with 100 µg/mL gentamycin, resuspended in PBS, and their GFP  
636 fluorescence and absorbance at OD<sub>600</sub> was measured immediately in a spectrophotometer.  
637 Asterisk indicates a statistically significant difference in pP<sub>siaA</sub>::gfp reporter activity  
638 relative to wild type PAO1 (p < 0.05, N = 6, ANOVA with post-hoc Dunnett).  
639 **Figure 1 – Supplement 5.** Psl and Pel polysaccharide production is highest in cells with  
640 high c-di-GMP as measured by the pP<sub>cdrA</sub>::gfp<sub>ASV</sub> reporter. Brackets indicate gates for  
641 polysaccharide-producing, TRITC lectin bound cells (TRITC above 10<sup>3</sup> RFU) or cells  
642 without lectin bound (TRITC below 10<sup>3</sup> RFU) on an LSR II flow cytometer and numbers  
643 above the brackets indicate the percentage of total cells that fall within the gate. a)  
644 Determination of the background level of TRITC autofluorescence in wild type PAO1  
645 that had not been stained with a TRITC-conjugated lectin. b) Determination of the a high  
646 level of TRITC-conjugated Psl-specific lectin binding in PAO1 P<sub>BAD-psl</sub> grown in shaken  
647 liquid culture for 4 hours with 1% arabinose before staining with the TRITC-HHA lectin  
648 and extensive washing. Approximately 60% of the cells have TRIT-C-HHA lectin bound  
649 to their surface. c) Determination of the a high level of TRITC-conjugated Pel-specific  
650 lectin binding in PAO1 P<sub>BAD-pel</sub> grown in shaken liquid culture for 4 hours with 1%

651 arabinose before staining with the TRITC-WFL lectin and extensive washing.

652 Approximately 18.1% of the cells have TRITC-HHA lectin bound to their surface. d) A

653 scatterplot of  $pP_{cdrA}::gfp_{ASV}$  reporter activity (GFP) on the x axis and Psl production (as

654 measured by binding of TRITC-HHA lectin to the cell surface) demonstrating the

655 specificity of GFP and TRITC gating in a negative control condition. Wild type PAO1

656 cells that do not contain the reporter and had not been stained with lectin mostly fall into

657 the lower left quadrant of “off” GFP and no TRITC-lectin binding. The purple numbers

658 in each quadrant represent the percentage of the total population that falls within that

659 quadrant. Quadrants were drawn based on gating of  $pP_{cdrA}::gfp_{ASV}$  reporter activity “on”

660 vs. “off” and lectin bound vs. unbound. e) Psl polysaccharide production is enriched in

661 the population of cells with high c-di-GMP. Representative scatterplot of reporter activity

662 versus Psl lectin binding in wild type PAO1 harboring the  $pP_{cdrA}::gfp_{ASV}$  reporter grown

663 for four hours in LB before surface attached cells were harvested, lectin stained, washed,

664 and counted by flow cytometry. f) Pel polysaccharide production is enriched in the

665 population of cells with high c-di-GMP. Representative scatterplot of reporter activity

666 versus Pel lectin binding in wild type PA14 harboring the  $pP_{cdrA}::gfp_{ASV}$  reporter grown

667 for four hours in Jensen’s minimal media plus glucose before surface attached cells were

668 harvested, lectin stained, washed, and counted by flow cytometry.

669 **Figure 1 – Supplement 6.** Development of a protocol to sort biofilm cells by

670  $pP_{cdrA}::gfp_{ASV}$  using flow assisted cell sorting (FACS). Brackets indicate gates for “on”

671 (GFP above  $1.1 \times 10^2$  RFU) or “off” (GFP below  $10^2$  RFU) reporter cells on a BD Aria

672 III flow cytometer and the number above the bracket indicates the percentage of cells that

673 fall within that gate. a) Wild type PAO1 cells were used to determine the background



674 level of fluorescence on the BD Aria III for GFP measurements. The population of cells  
675 centers around zero RFU. b) A *P. aeruginosa* strain constitutively expressing stable GFP  
676 (PAO1 Tn7::P(A1/04/03)::GFPmut) was used to determine gating for cells with high  
677 GFP, with the population centering around  $10^3$  RFU. c) PAO1  $\Delta_{wspF}\Delta_{pel}\Delta_{psl}$  harboring  
678 the pP<sub>cdrA</sub>::gfp<sub>ASV</sub> was used to draw a gate for collection of cells with high reporter  
679 activity (80% of the population). d) Example of gating for reporter “off” and “on” cells  
680 from wild type PAO1 pP<sub>cdrA</sub>::gfp<sub>ASV</sub> cells that had been grown on a surface for 4 hours  
681 prior to FACS sorting. Approximately 30% of the population falls into the reporter “on”  
682 population. A gap was left between the sorted “off” and “on” populations to increase the  
683 stringency of the sorting. e) Example of the “off” and “on” gates drawn on wild type  
684 PAO1 pP<sub>cdrA</sub>::gfp<sub>ASV</sub> cells that were grown planktonically to mid-log, demonstrating that  
685 the surface dependent nature of PcdrA reporter activity can be detected by flow  
686 cytometry.

687

688

689

690

691

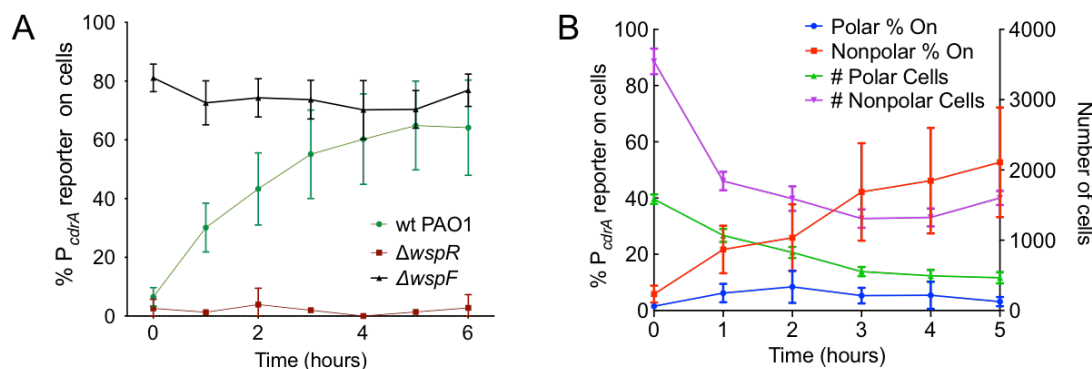

692

693 **Figure 2. The Wsp system generates heterogeneity in cellular levels of c-di-GMP**

694 **during early *P. aeruginosa* biofilm formation.**

695 (A) The Wsp system is required for activation of the pP<sub>cdrA</sub>::gfp<sub>ASV</sub> reporter during  
696 surface sensing. Six hour time course plot of the average percentage of surface-attached  
697 cells from either wild type PAO1 (green), PAO1 ΔwspR (red), or PAO1 ΔwspF (black) in  
698 which the pP<sub>cdrA</sub>::gfp<sub>ASV</sub> reporter had turned “on” at each hour. Cells were identified as  
699 “on” if their average GFP fluorescence was greater than twice the average background  
700 GFP fluorescence of the image. Error bars = standard deviation. N ≥ 3 biological  
701 replicates. See Figure 2 – Figure supplement 1 for the same timecourse using mutants in  
702 the Pil-Chp surface sensing system. Figure 2 – Figure supplement 2 shows representative  
703 images from Figure 2A. Figure 2 – Figure supplement 3 shows that complementing the  
704 wspR mutant restores wild type levels of reporter activity. Figure 2 – Figure supplement 4  
705 shows that the lab strain PA14 also displays Wsp-dependent c-di-GMP heterogeneity.

706 (B) Laterally attached cells have higher c-di-GMP levels than polarly attached cells. Five  
707 hour time course plot depicting, on the left axis, the percentage of pP<sub>cdrA</sub>::gfp<sub>ASV</sub> reporter  
708 “on” cells that were either polarly (blue) or laterally (red) attached to the surface of a  
709 glass coverslip in a flow cell at each hour. The right axis depicts the total number of polar

710 (green) and laterally attached (purple) cells at each time point. Cells were identified as  
711  $pP_{cdrA}:gfp_{ASV}$  reporter “on” if their average GFP fluorescence was greater than twice the  
712 average background GFP fluorescence of the image. Error bars = standard deviation. N =  
713 4 biological replicates.

714 **Figure 2 – Figure supplement 1.** Mutants predicted to inactivate the Pil-Chp surface  
715 sensing system largely retain  $pP_{cdrA}:gfp_{ASV}$  reporter activity during the first six hours of  
716 surface sensing. a) Representative images from wild type PAO1, PAO1  $\Delta sadC$ , PAO1  
717  $\Delta pilY1$ , and PAO1  $\Delta pilA$  after 6 hours of surface attachment. bf = bright field, merge =  
718 bright field and GFP channels combined. b) Six hour time course plot of the average  
719 percentage of cells from either wild type PAO1 (green), PAO1  $\Delta sadC$  (red), PAO1  
720  $\Delta pilY1$  (black), or PAO1  $\Delta pilA$  (blue) in which the  $pP_{cdrA}:gfp_{ASV}$  reporter had turned  
721 “on” at each hour. PAO1  $\Delta pilA$  is significantly different from wild type PAO1 from 2-6  
722 hours (T-test,  $p < 0.05$ ). Cells were identified as “on” if their average GFP fluorescence  
723 was greater than twice the average background GFP fluorescence of the image. Plotted  
724 values are the mean of at least 3 biological replicates and error bars are standard  
725 deviation.

726 **Figure 2 – Figure supplement 2.** The  $pP_{cdrA}:gfp_{ASV}$  reporter is sensitive to Wsp-  
727 dependent variation in c-di-GMP during surface sensing. Representative images from  
728 wild type PAO1, PAO1  $\Delta wspR$ , and PAO1  $\Delta wspF\Delta pelC\Delta pslD$  after 6 hours of surface  
729 attachment. bf = bright field, merge = bright field and GFP channels combined.

730 **Figure 2 – Figure supplement 3.** Complemented diguanylate cyclase mutants display  
731 wild type levels of  $P_{cdrA}:gfp_{ASV}$  reporter activity. PAO1  $\Delta wspR$  and PAO1  $\Delta sadC$  were  
732 complemented at a neutral site on the chromosome under control of their native

733 promoters. a) Representative images from wild type PAO1, PAO1  $\Delta wspR$  attCTX::*wspR*  
734 ( $\Delta wspR$ ::*wspR*), and PAO1  $\Delta sadC$  Tn7::*sadC* (PAO1  $\Delta sadC$ ::*sadC*) after 6 hours of  
735 surface attachment. bf = bright field, merge = bright field and GFP channels combined. b)  
736 Six hour time course plot of the average percentage of cells from either wild type PAO1  
737 (green), PAO1  $\Delta wspR$  attCTX::*wspR* (blue), or PAO1  $\Delta sadC$  Tn7::*sadC* in which the  
738 pP<sub>cdrA</sub>::*gfp*<sub>ASV</sub> reporter had turned “on” at each hour. Cells were identified as “on” if their  
739 average GFP fluorescence was greater than twice the average background GFP  
740 fluorescence of the image. Error bars = standard deviation, n  $\geq$  3 biological replicates.

741 **Figure 2 – Figure supplement 4.** Activity of the pP<sub>cdrA</sub>::*gfp*<sub>ASV</sub> reporter in strain PA14 is  
742 dependent on the Wsp system. a) Representative images from wild type PA14, PA14  
743  $\Delta wspR$ , and PA14  $\Delta wspF$  after 6 hours of surface attachment. bf = bright field, merge =  
744 bright field and GFP channels combined. b) Six hour time course plot of the average  
745 percentage of cells from either wild type PA14 (green), PA14  $\Delta wspR$  (red), or PA14  
746  $\Delta wspF$  (black) in which the pP<sub>cdrA</sub>::*gfp*<sub>ASV</sub> reporter had turned “on” at each hour. Cells  
747 were identified as “on” if their average GFP fluorescence was greater than twice the  
748 average background GFP fluorescence of the image. Error bars = standard deviation, n  $\geq$   
749 3 biological replicates.

750

751

752

753

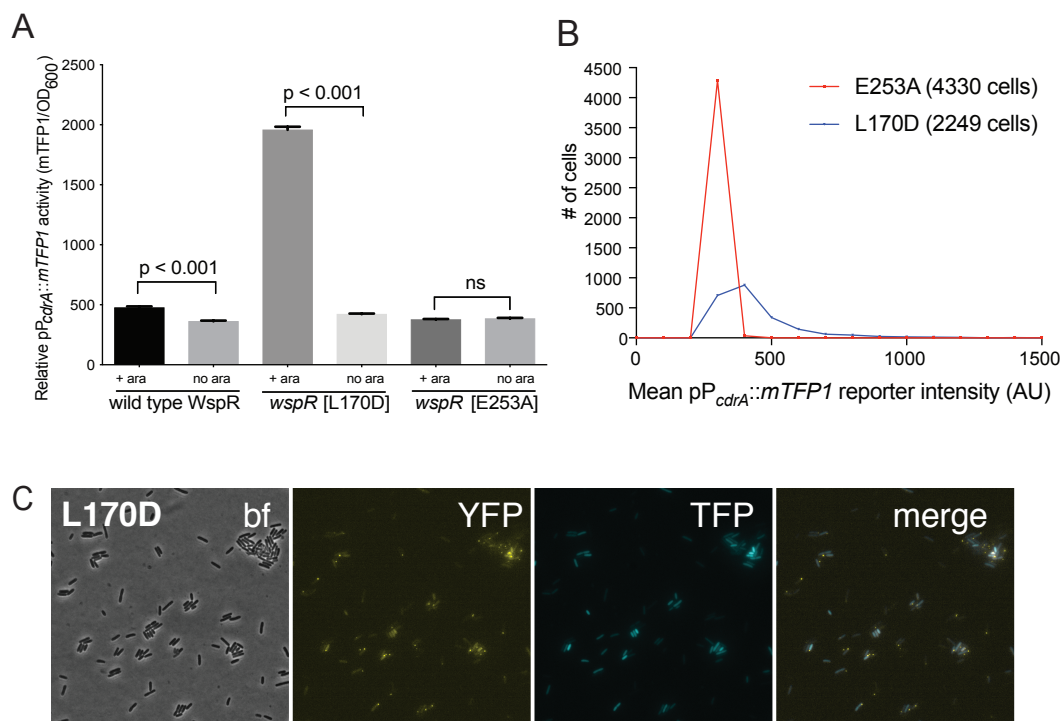

754

755 **Figure 3. Activity of the pP<sub>cdrA</sub>::mTFPI reporter is dependent on the ability of**  
 756 **WspR to produce c-di-GMP.**

757 (A) The pP<sub>cdrA</sub>::mTFPI reporter is active in surface grown cells with functional,  
 758 arabinose-inducible alleles of WspR when arabinose is added to the media. Wild type  
 759 WspR represents the strain PAO1  $\Delta$ wspR attCTX::wspR-eYFP. *wspR*[L170D] represents  
 760 the strain PAO1  $\Delta$ wspR attCTX::wspR[L170D]-eYFP, which produces large subcellular  
 761 clusters of WspR and grows as rugose small colonies on LB with 1% arabinose, a  
 762 phenotype that is indicative of high intracellular c-di-GMP. *wspR*[E253A] represents the  
 763 strain PAO1  $\Delta$ wspR attCTX::wspR[L170D]-eYFP cells, which forms large subcellular  
 764 WspR clusters, but does not produce c-di-GMP via WspR due to the point mutation  
 765 located in its active site. Cells were grown on LB agar plates with 100  $\mu$ g/mL gentamicin,  
 766 and in the presence or absence of 1% arabinose. Cells were resuspended in PBS and

767 mTFP1 fluorescence and OD<sub>600</sub> were measured. Relative pP<sub>cdrA</sub>::*mTFP1* reporter activity  
768 is the level of mTFP1 fluorescence normalized to OD<sub>600</sub>. Asterisk indicates statistical  
769 significance by Student's t-test (p < 0.001) in 6 technical replicates. Error bars = standard  
770 deviation.

771 (B) The pP<sub>cdrA</sub>::*mTFP1* reporter displays heterogeneity in a strain with a functional WspR  
772 (*wspR*[L170D]) and is consistently dark in a strain with inactive WspR. Histogram  
773 displaying the distribution of average cellular levels of mTFP1 fluorescence from  
774 expression of the pP<sub>cdrA</sub>::*mTFP1* reporter in either the PAO1  $\Delta$ *wspR*  
775 attCTX::*wspR*[L170D]-eYFP (blue) or PAO1  $\Delta$ *wspR* attCTX::*wspR*[L170D]-eYFP (red)  
776 backgrounds.

777 (C) Cells with visible subcellular clusters of WspR[L170D]-eYFP (strain PAO1  $\Delta$ *wspR*  
778 attCTX::*wspR*[L170D]-eYFP) also have high levels of c-di-GMP reporter activity. bf,  
779 bright field; YFP, *wspR*-YFP foci; mTFP1 = pP<sub>cdrA</sub>::*mTFP1* activity; and merge, merged  
780 YFP and TFP channels. PAO1  $\Delta$ *wspR* attCTX::*wspR*[L170D]-eYFP cells harboring the  
781 pP<sub>cdrA</sub>::mTFP1 reporter were grown on LB agar plates with 1% arabinose and 100  $\mu$ g/mL  
782 gentamicin, then spotted onto an agar pad and imaged immediately.

783

784

785

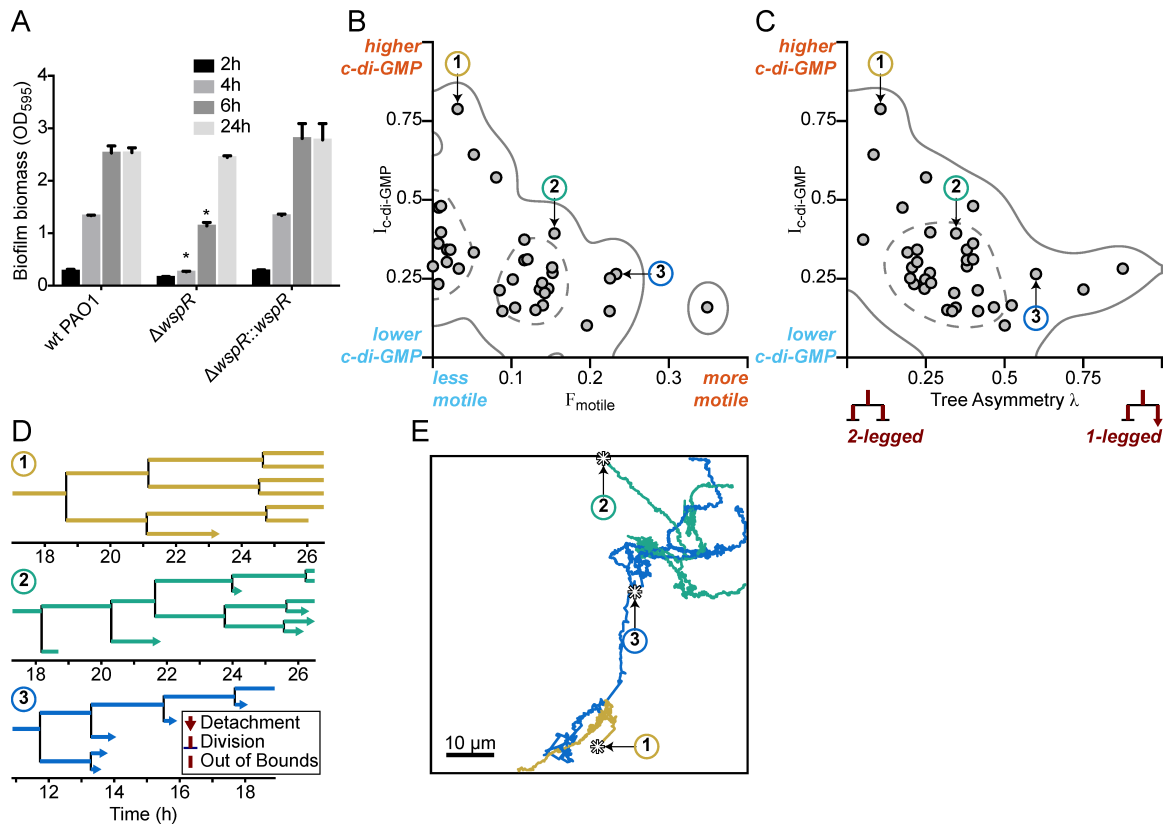

786

787 **Figure 4. Multigenerational c-di-GMP levels within populations of surface-attached**  
 788 **wild type PAO1 cells are inversely correlated with surface motility and detachment.**

789 (A) The Wsp surface sensing system is involved in the early stages of biofilm formation  
 790 in PAO1. Static biofilm assay performed in wild type PAO1, a single deletion mutant of  
 791 *wspR*, and the PAO1  $\Delta$ *wspR* mutant complemented with *wspR*. Between 4 and 6 hours,  
 792 PAO1  $\Delta$ *wspR* shows a defect in surface attachment and biofilm formation relative to the  
 793 wild type. However, after 24 hours, PAO1  $\Delta$ *wspR* formed equal biofilm biomass  
 794 compared to wild type. Plotted values are the mean of 6 technical replicates and error is  
 795 standard deviation. Asterisk indicates a statistically significant change in biomass relative  
 796 to wild type PAO1 at each time point (Student's t test;  $p < 0.05$ ).

797 (B) Plot of  $I_{c-di-GMP}$  vs  $F_{motile}$  for individual wild type PAO1 families.  $I_{c-di-GMP}$  is the  
 798 relative normalized c-di-GMP reporter intensity averaged across all members of a family.

799  $F_{\text{motile}}$  is the fraction of time that cells in a family are motile (specifically surface  
800 translational motility). Each circle represents an individual family ( $N = 35$ ) with at least 4  
801 tracked generations. Solid lines represent the 95% probability bounds and dashed lines  
802 represent the 50% probability bounds, calculated via kernel density estimation. Spearman  
803 correlation:  $\rho = -0.53$ ,  $p = 0.0012$ .

804 (C) Plot of  $I_{\text{c-di-GMP}}$  vs tree asymmetry  $\lambda$  for individual wild type PAO1 families. Colored  
805 numbers indicate the same 3 families from (B) and (D). Tree asymmetry  $\lambda$  quantifies the  
806 detachment behavior of family trees as follows.  $\lambda = 0$  corresponds to ideal trees with  
807 purely “two-legged” division-branching, when both daughter cells remain attached to the  
808 surface.  $\lambda = 1$  corresponds to ideal trees with purely “one-legged” division-branching  
809 when one daughter cell detaches or travels outside the field of view. Points here are the  
810 same families as in (B). Solid lines represent the 95% probability bounds and dashed  
811 lines represent the 50% probability bounds, calculated via kernel density estimation.  
812 Spearman correlation:  $\rho = -0.45$ ,  $p = 0.0068$ .

813 (D) Family trees of the same 3 representative wild type PAO1 families indicated in (B)  
814 and (C). Time 0 h is the start of the dataset recording. Lengths of horizontal lines on the  
815 plots are proportional to time spent in each generation. Horizontal lines that end with  
816 arrows are detachment events, lines that intersect with a vertical line are division events,  
817 and lines that end without a marker are out-of-bound events where we lose track of the  
818 bacterium (moving out of the field of view or reaching the end of the recording;  
819 represented as moving outside the XYT limits of the dataset boundaries). Vertical lines  
820 are arbitrarily spaced to show all the descendants. Colors represent the families in (B) and  
821 (C).



822 (E) Spatial trajectories of the 3 representative families. Asterisks (\*) represent the initial  
823 location of the founder cell. Scale bar 10  $\mu\text{m}$ . The families are color coded as in the  
824 previous panels.

825

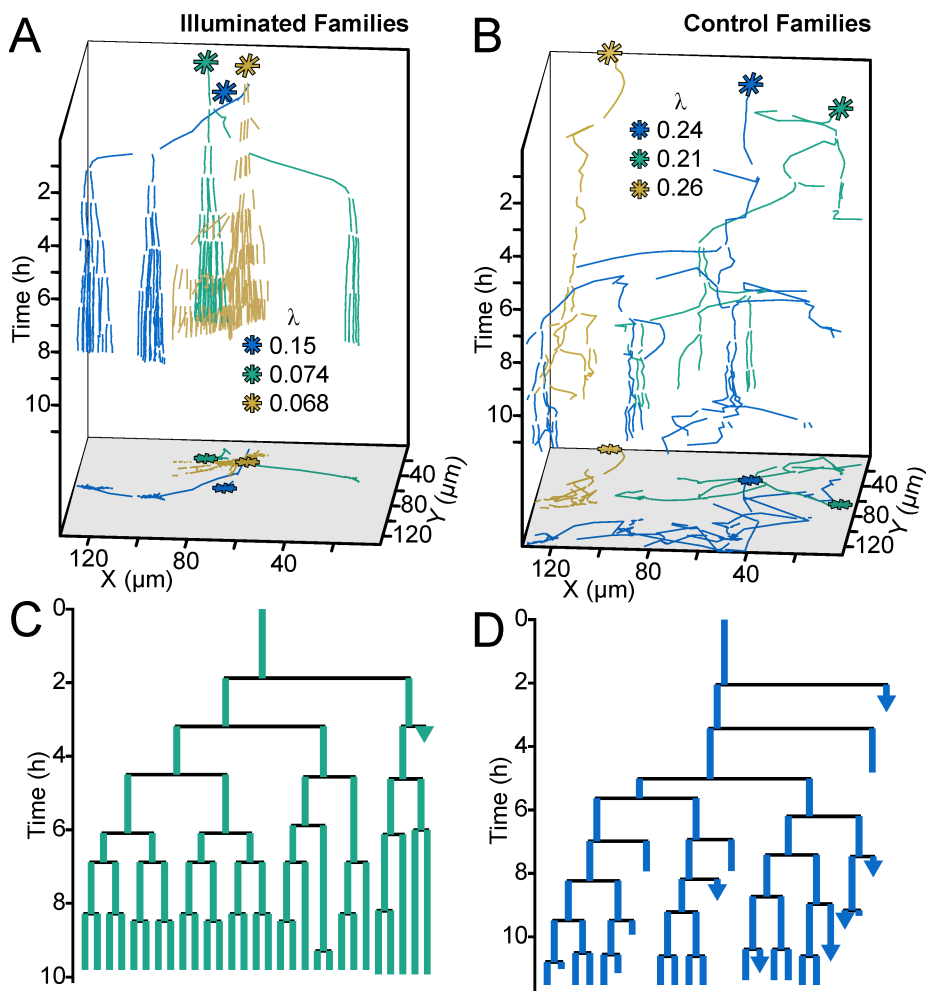

826

827 **Figure 5. Optogenetic control of c-di-GMP production drastically affects family**  
828 **architecture and surface motility.**

829 (A,B) Spatiotemporal plot of 3 illuminated families (A) and 3 control families (B). The  
830 individual cell tracks in the 3D plot are projected onto the XY plane as spatial  
831 trajectories. As in figure 4,  $\lambda$  is a measure of tree asymmetry, with higher values  
832 indicating more cells traveling outside the field of view or detaching. In A, the  
833 illuminated families tend to be sessile, as expected for cells with high c-di-GMP. In B,  
834 control cells are more motile than the illuminated cells in A.

835 (C,D) Family trees of a single corresponding family in (A) and (B), where the color  
836 corresponds to the same family. Illuminated cells (C) tend to stay adhered across multiple

837 generations, whereas control cells (D) display more surface motility and detachments.  
838 See Movie 1 for a representative video of the optogenetic reporter experiment. Figure 5 –  
839 Figure supplement 1 shows a schematic of the ATIM apparatus. Figure 5 – See Figure  
840 supplement 2 for the data from Figure 5 overlaid onto Figure 4C, showing that  
841 ptogenetic-controlled families follow the trend of family behavior observed in wt PAO1  
842 cells.

843 **Figure 5 – Figure supplement 1.** Using Adaptive Tracking Illumination Microscopy  
844 (ATIM) to exactly illuminate single *P. aeruginosa* cells on surface. (a) Schematic  
845 drawing of the ATI system. A high-throughput bacterial tracking algorithm was  
846 employed for analyzing cells' behavior in real time and the information was immediately  
847 fed back to an adaptive microscope equipped with a digital micromirror device (DMD).  
848 (b) Example depicting one cell of interest being tracked and projected in real time. (c)  
849 The feedback illumination can generate projected patterns to exactly follow the daughter  
850 cells after the tracked cell divides. Scale bar for all images is 5 $\mu$ m.

851 **Figure 5 – Figure supplement 2.** Optogenetic-controlled families follow the trend of  
852 family behavior observed in wt PAO1 cells, with illuminated families resembling the  
853 high c-di-GMP matrix producers and control families resembling low c-di-GMP surface  
854 explorers. Families plotted in Figure 5 (plus one additional control family) are plotted on  
855 top of Figure 4C ( $I_{c-di-GMP}$  vs  $\lambda$ ). Red triangles and blue triangles represent the  
856 illuminated and control families, respectively, while the original data from Figure 4C is  
857 greyed out. Illuminated families have higher  $I_{c-di-GMP}$  and lower  $\lambda$  than the control  
858 families.

859

860 **Movie 1. Single cells are precisely illuminated by ATIM via *in situ* analysis and**  
861 **tracking of bacteria.** The left panel shows the merged images of *gfp*<sub>ASV</sub> and mCherry  
862 fluorescence microscopy images over time. The right panel shows the merged images of  
863 red LED projected patterns and bright field images corresponding to the left panel. The  
864 fluorescence intensity of *gfp*<sub>ASV</sub> in the illuminated cells and their offspring (colored red in  
865 right panel) is significantly increased after using ATI for 460 mins. In contrast, the *gfp*<sub>ASV</sub>  
866 fluorescence intensity of the un-illuminated cells remains low and these cells remain  
867 motile.

868

869

870

871 **Table 1.**

872 Strains, primers, and plasmids used in this study.

| <i>P. aeruginosa</i> Strains                                          |                                                                                                                                            | Reference               |
|-----------------------------------------------------------------------|--------------------------------------------------------------------------------------------------------------------------------------------|-------------------------|
| PAO1                                                                  | wild-type                                                                                                                                  | Holloway, 1979          |
| PA14                                                                  | wild-type                                                                                                                                  | Rahme, 1995             |
| PAO1 $\Delta$ <i>wspF</i>                                             | markerless, in frame deletion of WspF                                                                                                      | Hickman, 2005           |
| PAO1 $\Delta$ <i>wspF</i> $\Delta$ <i>pelA</i> $\Delta$ <i>pslBCD</i> | markerless, in frame deletions of WspF, PelA, and PslBCD genes                                                                             | Rybtke, 2012            |
| PAO1 $\Delta$ <i>wspR</i>                                             | markerless, in frame deletion of WspR                                                                                                      | Hickman, 2005           |
| PAO1 $\Delta$ <i>pilY1</i>                                            | markerless, in frame deletion of PilY1                                                                                                     | this study              |
| PAO1 $\Delta$ <i>sadC</i>                                             | markerless, in frame deletion of SadC                                                                                                      | Irie, 2012              |
| PAO1 $\Delta$ <i>pilA</i>                                             | markerless, in frame deletion of PilA                                                                                                      | Shrout, 2006            |
| PAO1 $\Delta$ <i>dipA</i>                                             | markerless, in frame deletion of DipA                                                                                                      | this study              |
| PAO1 $\Delta$ <i>wspR</i><br>attCTX:: <i>PwspA</i> :: <i>wspR</i>     | PAO1 $\Delta$ <i>wspR</i> complemented with WspR under control of the Wsp operon promoter and including intergenic region upstream of WspR | Gift from Yasuhiko Irie |

|                                                                                                     |                                                                                                                |                            |
|-----------------------------------------------------------------------------------------------------|----------------------------------------------------------------------------------------------------------------|----------------------------|
| PAO1 $\Delta$ <i>sadC</i> attCTX:: <i>sadC</i>                                                      | PAO1 $\Delta$ <i>sadC</i> complemented with SadC under control of its native promoter                          | Gift from Yasuhiko Irie    |
| MPAO1 attTn7::P(A1/04/03)::GFPmut                                                                   | wild type MPAO1 constitutively expressive stable GFP                                                           | this study                 |
| PA14 $\Delta$ <i>wspF</i>                                                                           | markerless, in frame deletion of WspF                                                                          | Gift from Caroline Harwood |
| PA14 $\Delta$ <i>wspR</i>                                                                           | markerless, in frame deletion of WspR                                                                          | Gift from Caroline Harwood |
| PAO1 $\Delta$ <i>wspR</i> attCTX::PBAD- <i>wspR</i> -eYFP                                           | markerless, in frame deletion of WspR with arabinose-inducible, C-terminally eYFP-tagged wild type WspR allele | Huangyutitham, 2013        |
| PAO1 $\Delta$ <i>wspR</i> attCTX::PBAD- <i>wspR</i> [L170D]-eYFP                                    | markerless, in frame deletion of WspR with arabinose-inducible, C-terminally eYFP-tagged WspR[L170D] allele    | Huangyutitham, 2013        |
| PAO1 $\Delta$ <i>wspR</i> attCTX::PBAD- <i>wspR</i> [E253A]-eYFP                                    | markerless, in frame deletion of WspR with arabinose-inducible, C-terminally eYFP-tagged WspR[E253A] allele    | Huangyutitham, 2013        |
| <b><i>P. aeruginosa</i> Reporter Strains</b>                                                        |                                                                                                                |                            |
| PAO1 pMH489                                                                                         |                                                                                                                | Rybtke, 2012               |
| PAO1 p <i>PcdrA</i> :: <i>gfpASV</i>                                                                |                                                                                                                | Rybtke, 2012               |
| PAO1 p <i>PsiaA</i> :: <i>gfpASV</i>                                                                |                                                                                                                | this study                 |
| PA14 pMH489                                                                                         |                                                                                                                | this study                 |
| PA14 p <i>PcdrA</i> :: <i>gfpASV</i>                                                                |                                                                                                                | this study                 |
| PAO1 $\Delta$ <i>wspF</i> pMH489                                                                    |                                                                                                                | this study                 |
| PAO1 $\Delta$ <i>wspF</i> p <i>PcdrA</i> :: <i>gfpASV</i>                                           |                                                                                                                | this study                 |
| PAO1 $\Delta$ <i>wspF</i> p <i>PsiaA</i> :: <i>gfp</i>                                              |                                                                                                                | this study                 |
| PAO1 $\Delta$ <i>wspF</i> $\Delta$ <i>pelC</i> $\Delta$ <i>pslD</i> pMH489                          |                                                                                                                | this study                 |
| PAO1 $\Delta$ <i>wspF</i> $\Delta$ <i>pelC</i> $\Delta$ <i>pslD</i> p <i>PcdrA</i> :: <i>gfpASV</i> |                                                                                                                | this study                 |
| PAO1 $\Delta$ <i>wspR</i> pMH489                                                                    |                                                                                                                | this study                 |
| PAO1 $\Delta$ <i>wspR</i> p <i>PcdrA</i> :: <i>gfpASV</i>                                           |                                                                                                                | this study                 |
| PAO1 $\Delta$ <i>wspR</i> p <i>PsiaA</i> :: <i>gfp</i>                                              |                                                                                                                | this study                 |
| PAO1 $\Delta$ <i>pilY1</i> pMH489                                                                   |                                                                                                                | this study                 |
| PAO1 $\Delta$ <i>pilY1</i> p <i>PcdrA</i> :: <i>gfpASV</i>                                          |                                                                                                                | this study                 |
| PAO1 $\Delta$ <i>sadC</i> pMH489                                                                    |                                                                                                                | this study                 |
| PAO1 $\Delta$ <i>sadC</i> p <i>PcdrA</i> :: <i>gfpASV</i>                                           |                                                                                                                | this study                 |
| PAO1 $\Delta$ <i>pilA</i> pMH489                                                                    |                                                                                                                | this study                 |
| PAO1 $\Delta$ <i>pilA</i> p <i>PcdrA</i> :: <i>gfpASV</i>                                           |                                                                                                                | this study                 |
| PAO1 $\Delta$ <i>dipA</i> pMH489                                                                    |                                                                                                                | this study                 |
| PAO1 $\Delta$ <i>dipA</i> p <i>PcdrA</i> :: <i>gfpASV</i>                                           |                                                                                                                | this study                 |

|                                                                                           |                                                                              |                        |
|-------------------------------------------------------------------------------------------|------------------------------------------------------------------------------|------------------------|
| PAO1 $\Delta$ <i>wspR</i><br>attCTX:: <i>PwspA::wspR</i><br>pMH489                        |                                                                              | this study             |
| PAO1 $\Delta$ <i>wspR</i><br>attCTX:: <i>PwspA::wspR</i><br>p <i>PcdrA::gfpASV</i>        |                                                                              | this study             |
| PAO1 $\Delta$ <i>sadC</i> att:: <i>sadC</i><br>pMH489                                     |                                                                              | this study             |
| PAO1 $\Delta$ <i>sadC</i> att:: <i>sadC</i><br>p <i>PcdrA::gfpASV</i>                     |                                                                              | this study             |
| PA14 $\Delta$ <i>wspF</i> pMH489                                                          |                                                                              | this study             |
| PA14 $\Delta$ <i>wspF</i> p <i>PcdrA::gfpASV</i>                                          |                                                                              | this study             |
| PA14 $\Delta$ <i>wspR</i> pMH489                                                          |                                                                              | this study             |
| PA14 $\Delta$ <i>wspR</i> p <i>PcdrA::gfpASV</i>                                          |                                                                              | this study             |
| PAO1 $\Delta$ <i>wspR</i> attCTX:: <i>PBAD-wspR-eYFP</i> p <i>PcdrA::mTFP1</i>            |                                                                              | this study             |
| PAO1 $\Delta$ <i>wspR</i> attCTX:: <i>PBAD-wspR</i> [L170D]-eYFP<br>p <i>PcdrA::mTFP1</i> |                                                                              | this study             |
| PAO1 $\Delta$ <i>wspR</i> attCTX:: <i>PBAD-wspR</i> [E253A]-eYFP<br>p <i>PcdrA::mTFP1</i> |                                                                              | this study             |
| PAO1 attCTX:: <i>bphS</i><br>attMiniTn7:: <i>mCherry</i><br>p <i>PcdrA::gfpASV</i>        |                                                                              | this study             |
| PAO1 attMiniTn7:: <i>mCherry</i><br>p <i>PcdrA::gfpASV</i>                                |                                                                              | this study             |
| <b><i>E. coli</i> Strains</b>                                                             |                                                                              |                        |
| <i>E. coli</i> S17.1<br>pENTRPEX18Gm:: $\Delta$ <i>pilY1</i>                              | conjugation proficient <i>E. coli</i> harboring <i>pilY1</i> deletion allele | Gift from Joe Harrison |
| <i>E. coli</i> S17.1<br>pENTRPEX18Gm:: $\Delta$ <i>dipA</i>                               | conjugation proficient <i>E. coli</i> harboring <i>dipA</i> deletion allele  | Gift from Joe Harrison |
| <i>E. coli</i> DH5 $\alpha$ pUC18-miniTn7T2- <i>PcdrA</i> -RBSg10L- <i>gfpAGA</i>         | source of <i>PcdrA</i> -RBSg10L                                              | this study             |
| <i>E. coli</i> DH5 $\alpha$ pBBR1MCS5- <i>PcdrA::RBSg10L::mTFP1</i>                       | referred to as " <i>pPcdrA::mTFP1</i> "                                      | this study             |
| <i>E. coli</i> DH5 $\alpha$ p <i>PsiaA::gfp</i>                                           | plasmid-based, fluorescent <i>siaA</i> transcriptional reporter              | this study             |
| <b>Primers</b>                                                                            |                                                                              |                        |
| PAO1 <i>pilY1</i> -SEQ-F                                                                  | CTACTACGAGACCAATAGCGTC                                                       | this study             |
| PAO1 <i>pilY1</i> -SEQ-R                                                                  | GTCGATGTCCACCAGGTTCTTC                                                       | this study             |
| PAO1 <i>dipA</i> -SEQ-F                                                                   | GATACGCTTAACTTGGGCCCTG                                                       | this study             |
| PAO1 <i>dipA</i> -SEQ-R                                                                   | CTTTTCTTGGTGAGGATTCAGAAC                                                     | this study             |
| PA14 <i>wspR</i> -SEQ-F                                                                   | GCTTCCTCACCATCGCCC                                                           | this study             |

|                       |                                                                                                                                                                                                      |              |
|-----------------------|------------------------------------------------------------------------------------------------------------------------------------------------------------------------------------------------------|--------------|
| PA14wspR-SEQ-R        | CAGGTCGTCCAGGGTTTCC                                                                                                                                                                                  | this study   |
| PA14wspF-SEQ-F        | CTCACGGTGCCTGAGCTG                                                                                                                                                                                   | this study   |
| PA14wspF-SEQ-R        | GGTCCTGGAGGATCACCG                                                                                                                                                                                   | this study   |
| SacI – PcdrA - F      | GGGGAGCTC<br>GTATGGAAGGTTCCCTTGCGG                                                                                                                                                                   | this study   |
| SOE-PcdrA-RBSg10L - R | ctcctcgcccttgcacat<br>GGATATATCTCCTTCTTAAAG                                                                                                                                                          | this study   |
| mTFP1 - F             | atggtgagcaagggcgaggag                                                                                                                                                                                | this study   |
| KpnI - mTFP1 – R      | GGGGTACC ttactgttacagctcgcc                                                                                                                                                                          | this study   |
| BamHI-Psia-F          | GGG GGATCC<br>GGCAGCGGCAACCGCCTCTG                                                                                                                                                                   | this study   |
| SiaA-BamHI-R          | CCC GGATCC<br>CAACCCCCAGTTCGCCGCCAT                                                                                                                                                                  | this study   |
| M13F(-21)             | TGTAAAACGACGGCCAGT                                                                                                                                                                                   | GeneWiz      |
| M13R                  | CAGGAAACAGCTATGAC                                                                                                                                                                                    | GeneWiz      |
| ampR-F-qPCR           | GCG CCA TCC CTT CAT CG                                                                                                                                                                               | Colvin, 2011 |
| ampR-R-qPCR           | GAT GTC GAC GCG GTT GTT G                                                                                                                                                                            | Colvin, 2011 |
| pslA-F-qPCR           | AAG ATC AAG AAA CGC GTG GAA T                                                                                                                                                                        | Colvin, 2011 |
| pslA-R-qPCR           | TGT AGA GGT CGA ACC ACA CCG                                                                                                                                                                          | Colvin, 2011 |
| pelA-F-qPCR           | CCT TCA GCC ATC CGT TCT TCT                                                                                                                                                                          | Colvin, 2011 |
| pelA-R-qPCR           | TCG CGT ACG AAG TCG ACC TT                                                                                                                                                                           | Colvin, 2011 |
| rplU-F-qPCR           | CGC AGT GAT TGT TAC CGG TG                                                                                                                                                                           | Colvin, 2011 |
| rplU-R-qPCR           | AGG CCT GAA TGC CGG TGA TC                                                                                                                                                                           | Colvin, 2011 |
| OBT268                | GGGGACAACCTTTTGTATACAAAGTTGTA<br>CTATAGAGGGACAACTCAAGGTCATTC<br>GCAAGAGTGGCCTTTATGATTGACCTTC<br>TTCCGGTTAATACGACCGGGATAACTCC<br>ACTTGAGACGTGAAAAAAGAGGAGTAT<br>TCATGCGTAAAGGAGAAGAACTTTTCAC<br>TGGAG | This study   |
| OBT269                | GGGGACAAGTTTGTACAAAAAAGCAGG<br>CTCGGCTTATTTGTATAGTTCATCCATGC<br>CATGTGTAATC                                                                                                                          | This study   |
| OBT314                | CAGGTCGACTCTAGAGGATCCCCATCAG<br>AAAATTTATCAAAAAGAGTGTTGACTTG<br>TGAGCGGATAACAATGATACTTAGATTC<br>AATTGTGAGCGGATAACAATTTACACA<br>TCTAGAATTAAGAGGAGAAATTAAGC<br>ATGGTGAGCAAGGGCGAGGAG                   | Zhao, 2013   |
| OBT315                | CTCCTCGCCCTTGCTCACCATGCTTAATT<br>TCTCCTCTTTAATTCTAGATGTGTGAAAT<br>TGTTATCCGCTCACAATTGAATCTAAGT<br>ATCATTGTTATCCGCTCACAAGTCAACA<br>CTCTTTTGTATAAATTTCTGATGGGGAT<br>CCTCTAGAGTCGACCTG                  | Zhao, 2013   |
| pPcdrA::gfpASV        | PcdrA reporter with short halflife GFP                                                                                                                                                               | Rybtke, 2012 |

|                                                        |                                                                                                                                 |                        |
|--------------------------------------------------------|---------------------------------------------------------------------------------------------------------------------------------|------------------------|
| pENTRPEX18Gm:: <i>ΔpilY1</i>                           | suicide plasmid containing <i>pilY1</i> deletion construct for use in PAO1                                                      | Gift from Joe Harrison |
| pENTRPEX18Gm:: <i>ΔdipA</i>                            | suicide plasmid containing <i>dipA</i> deletion construct for use in PAO1                                                       | Gift from Joe Harrison |
| pBBR1MCS5                                              | broad host range vector that is stable in <i>P. aeruginosa</i> , GentR                                                          | Kovach, 1995           |
| pUC18-miniTn7T2- <i>PcdrA</i> -RBSg10L- <i>gfp</i> AGA | source plasmid containing promoter of <i>cdrA</i> with enhanced ribosomal binding site                                          | this study             |
| pNCS-mTFP1                                             | source plasmid containing mTFP1                                                                                                 | Allele Biotech         |
| pBBR1MCS5- <i>PcdrA</i> ::RBSg10L::mTFP1               | teal fluorescent protein version of <i>PcdrA</i> reporter                                                                       | this study             |
| p <i>PsiaA</i> :: <i>gfp</i>                           | <i>PsiaA</i> reporter expressing stable GFP, constructed using pMH487 plasmid                                                   | this study             |
| pBT270                                                 | miniTn7 transposon with <i>gfpmut3</i> driven by the A1/04/03 promoter; Ap <sup>r</sup> , Gm <sup>r</sup>                       | This study             |
| pTNS2                                                  | T7 transposase expression vector                                                                                                | Choi, 2006             |
| pBT223                                                 | miniTn7 transposon with <i>gfpmut3</i> driven by the <i>trc</i> promoter; Ap <sup>r</sup> , Gm <sup>r</sup>                     | This study             |
| pBT212                                                 | A GateWay compatible plasmid containing <i>gfpmut3</i> flanked by attR5 and attL1 recombination sites; Km <sup>r</sup>          | This study             |
| pBT200                                                 | A GateWay compatible plasmid containing the <i>trc</i> promoter flanked by attL2 and attL5 recombination sites; Kn <sup>r</sup> | Zhao, 2013             |
| pUC18-miniTn7T2-Gm-GW                                  | A GateWay compatible mini-Tn7 based vector; Cm <sup>r</sup> , Ap <sup>r</sup> and Gm <sup>r</sup> ;                             | Zhao, 2013             |
| AKN66                                                  | source for <i>gfpmut3</i>                                                                                                       | Lambertsen, 2004)      |
| pDONR221 P1-P5r                                        | A GateWay compatible vector with attP1 and attP5r recombination sites and <i>ccdB</i> ; Kn <sup>r</sup> and Cm <sup>r</sup>     | Invitrogen             |

873

874

875

876

877



878 **References**

- 879 1. M. E. Davey, G. A. O'toole, Microbial biofilms: from ecology to molecular genetics.  
880 *Microbiol. Mol. Biol. Rev. MMBR.* **64**, 847–867 (2000).
- 881 2. U. Römling, M. Y. Galperin, M. Gomelsky, Cyclic di-GMP: the First 25 Years of a  
882 Universal Bacterial Second Messenger. *Microbiol. Mol. Biol. Rev. MMBR.* **77**, 1–52  
883 (2013).
- 884 3. L. Ma *et al.*, Assembly and development of the *Pseudomonas aeruginosa* biofilm  
885 matrix. *PLoS Pathog.* **5**, e1000354 (2009).
- 886 4. K. M. Colvin *et al.*, The Pel Polysaccharide Can Serve a Structural and Protective  
887 Role in the Biofilm Matrix of *Pseudomonas aeruginosa*. *PLoS Pathog.* **7**, e1001264  
888 (2011).
- 889 5. Y. Irie *et al.*, Self-produced exopolysaccharide is a signal that stimulates biofilm  
890 formation in *Pseudomonas aeruginosa*. *Proc. Natl. Acad. Sci.* **109**, 20632–20636  
891 (2012).
- 892 6. N. Billings *et al.*, The Extracellular Matrix Component Psl Provides Fast-Acting  
893 Antibiotic Defense in *Pseudomonas aeruginosa* Biofilms. *PLoS Pathog.* **9**,  
894 e1003526 (2013).
- 895 7. K. Zhao *et al.*, Psl trails guide exploration and microcolony formation in  
896 *Pseudomonas aeruginosa* biofilms. *Nature.* **497**, 388–391 (2013).
- 897 8. C. R. Armbruster *et al.*, Staphylococcus aureus Protein A Mediates Interspecies  
898 Interactions at the Cell Surface of *Pseudomonas aeruginosa*. *mBio.* **7** (2016),  
899 doi:10.1128/mBio.00538-16.
- 900 9. Q. Wei, L. Z. Ma, Biofilm Matrix and Its Regulation in *Pseudomonas aeruginosa*. *Int.*  
901 *J. Mol. Sci.* **14**, 20983–21005 (2013).
- 902 10. M. Starkey *et al.*, *Pseudomonas aeruginosa* rugose small-colony variants have  
903 adaptations that likely promote persistence in the cystic fibrosis lung. *J. Bacteriol.*  
904 **191**, 3492–3503 (2009).
- 905 11. A. I. Chen *et al.*, *Candida albicans* Ethanol Stimulates *Pseudomonas aeruginosa*  
906 WspR-Controlled Biofilm Formation as Part of a Cyclic Relationship Involving  
907 Phenazines. *PLOS Pathog.* **10**, e1004480 (2014).
- 908 12. V. Huangyutitham, Z. T. Güvener, C. S. Harwood, Subcellular Clustering of the  
909 Phosphorylated WspR Response Regulator Protein Stimulates Its Diguanylate  
910 Cyclase Activity. *mBio.* **4** (2013), doi:10.1128/mBio.00242-13.
- 911 13. Y. Luo *et al.*, A Hierarchical Cascade of Second Messengers Regulates *Pseudomonas*  
912 *aeruginosa* Surface Behaviors. *mBio.* **6** (2015), doi:10.1128/mBio.02456-14.

- 913 14. S. L. Kuchma *et al.*, Cyclic-di-GMP-Mediated Repression of Swarming Motility by  
914 *Pseudomonas aeruginosa*: the pilY1 Gene and Its Impact on Surface-Associated  
915 Behaviors. *J. Bacteriol.* **192**, 2950–2964 (2010).
- 916 15. A. Persat, Y. F. Inclan, J. N. Engel, H. A. Stone, Z. Gitai, Type IV pili  
917 mechanochemically regulate virulence factors in *Pseudomonas aeruginosa*. *Proc.*  
918 *Natl. Acad. Sci.* **112**, 7563–7568 (2015).
- 919 16. J. R. O’Connor, N. J. Kuwada, V. Huangyutitham, P. A. Wiggins, C. S. Harwood,  
920 Surface sensing and lateral subcellular localization of WspA, the receptor in a  
921 chemosensory-like system leading to c-di-GMP production. *Mol. Microbiol.* **86**,  
922 720–729 (2012).
- 923 17. J. W. Hickman, C. S. Harwood, Identification of FleQ from *Pseudomonas aeruginosa*  
924 as a c-di-GMP-responsive transcription factor. *Mol. Microbiol.* **69**, 376–389 (2008).
- 925 18. C. Baraquet, K. Murakami, M. R. Parsek, C. S. Harwood, The FleQ protein from  
926 *Pseudomonas aeruginosa* functions as both a repressor and an activator to control  
927 gene expression from the pel operon promoter in response to c-di-GMP. *Nucleic*  
928 *Acids Res.* **40**, 7207–7218 (2012).
- 929 19. M. T. Rybtke *et al.*, Fluorescence-Based Reporter for Gauging Cyclic Di-GMP  
930 Levels in *Pseudomonas aeruginosa*. *Appl. Environ. Microbiol.* **78**, 5060–5069  
931 (2012).
- 932 20. C. Baraquet, C. S. Harwood, FleQ DNA Binding Consensus Sequence Revealed by  
933 Studies of FleQ-Dependent Regulation of Biofilm Gene Expression in *Pseudomonas*  
934 *aeruginosa*. *J. Bacteriol.* **198**, 178–186 (2015).
- 935 21. L. K. Jennings *et al.*, Pel is a cationic exopolysaccharide that cross-links extracellular  
936 DNA in the *Pseudomonas aeruginosa* biofilm matrix. *Proc. Natl. Acad. Sci. U. S. A.*  
937 **112**, 11353–11358 (2015).
- 938 22. H. Kulesekara *et al.*, Analysis of *Pseudomonas aeruginosa* diguanylate cyclases and  
939 phosphodiesterases reveals a role for bis-(3'-5')-cyclic-GMP in virulence. *Proc.*  
940 *Natl. Acad. Sci. U. S. A.* **103**, 2839–2844 (2006).
- 941 23. C. K. Lee *et al.*, Multigenerational memory and adaptive adhesion in early bacterial  
942 biofilm communities. *Proc. Natl. Acad. Sci.* **115**, 4471 (2018).
- 943 24. J. Ribbe, A. E. Baker, S. Euler, G. A. O’Toole, B. Maier, Role of Cyclic Di-GMP and  
944 Exopolysaccharide in Type IV Pilus Dynamics. *J. Bacteriol.* **199**, e00859-16  
945 (2017).
- 946 25. M.-H. Ryu, M. Gomelsky, Near-infrared Light Responsive Synthetic c-di-GMP  
947 Module for Optogenetic Applications. *ACS Synth. Biol.* **3**, 802–810 (2014).

- 948 26. M. Ackermann, A functional perspective on phenotypic heterogeneity in  
949 microorganisms. *Nat Rev Micro.* **13**, 497–508 (2015).
- 950 27. D. Dubnau, R. Losick, Bistability in bacteria. *Mol. Microbiol.* **61**, 564–572 (2006).
- 951 28. M. B. Elowitz, A. J. Levine, E. D. Siggia, P. S. Swain, Stochastic Gene Expression in  
952 a Single Cell. *Science.* **297**, 1183 (2002).
- 953 29. J. Casadesús, D. Low, Epigenetic Gene Regulation in the Bacterial World. *Microbiol.*  
954 *Mol. Biol. Rev.* **70**, 830–856 (2006).
- 955 30. B.-J. Laventie *et al.*, A Surface-Induced Asymmetric Program Promotes Tissue  
956 Colonization by *Pseudomonas aeruginosa*. *Cell Host Microbe.* **25**, 140-152.e6  
957 (2019).
- 958 31. B. R. Kulasekara *et al.*, c-di-GMP heterogeneity is generated by the chemotaxis  
959 machinery to regulate flagellar motility. *eLife.* **2**, e01402 (2013).
- 960 32. H. J. VOGEL, D. M. BONNER, Acetylornithinase of *Escherichia coli*: partial  
961 purification and some properties. *J. Biol. Chem.* **218**, 97–106 (1956).
- 962 33. L. R. Hmelo *et al.*, Precision-engineering the *Pseudomonas aeruginosa* genome with  
963 two-step allelic exchange. *Nat Protoc.* **10**, 1820–1841 (2015).
- 964 34. K.-H. Choi, H. P. Schweizer, mini-Tn7 insertion in bacteria with single attTn7 sites:  
965 example *Pseudomonas aeruginosa*. *Nat. Protoc.* **1**, 153 (2006).
- 966 35. M. Lanzer, H. Bujard, Promoters largely determine the efficiency of repressor action.  
967 *Proc. Natl. Acad. Sci. U. S. A.* **85**, 8973–8977 (1988).
- 968 36. T. T. Hoang, A. J. Kutchma, A. Becher, H. P. Schweizer, Integration-Proficient  
969 Plasmids for *Pseudomonas aeruginosa*: Site-Specific Integration and Use for  
970 Engineering of Reporter and Expression Strains. *Plasmid.* **43**, 59–72 (2000).
- 971 37. K. M. Colvin *et al.*, The Pel and Psl polysaccharides provide *Pseudomonas*  
972 *aeruginosa* structural redundancy within the biofilm matrix. *Environ. Microbiol.* **14**,  
973 1913–1928 (2012).
- 974 38. B. R. Borlee *et al.*, *Pseudomonas aeruginosa* uses a cyclic-di-GMP-regulated adhesin  
975 to reinforce the biofilm extracellular matrix. *Mol. Microbiol.* **75**, 827–842 (2010).
- 976
- 977

Figure 1 – Supplement 1

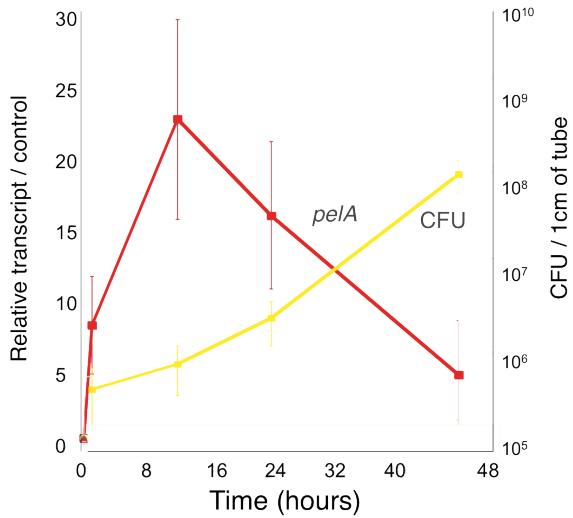

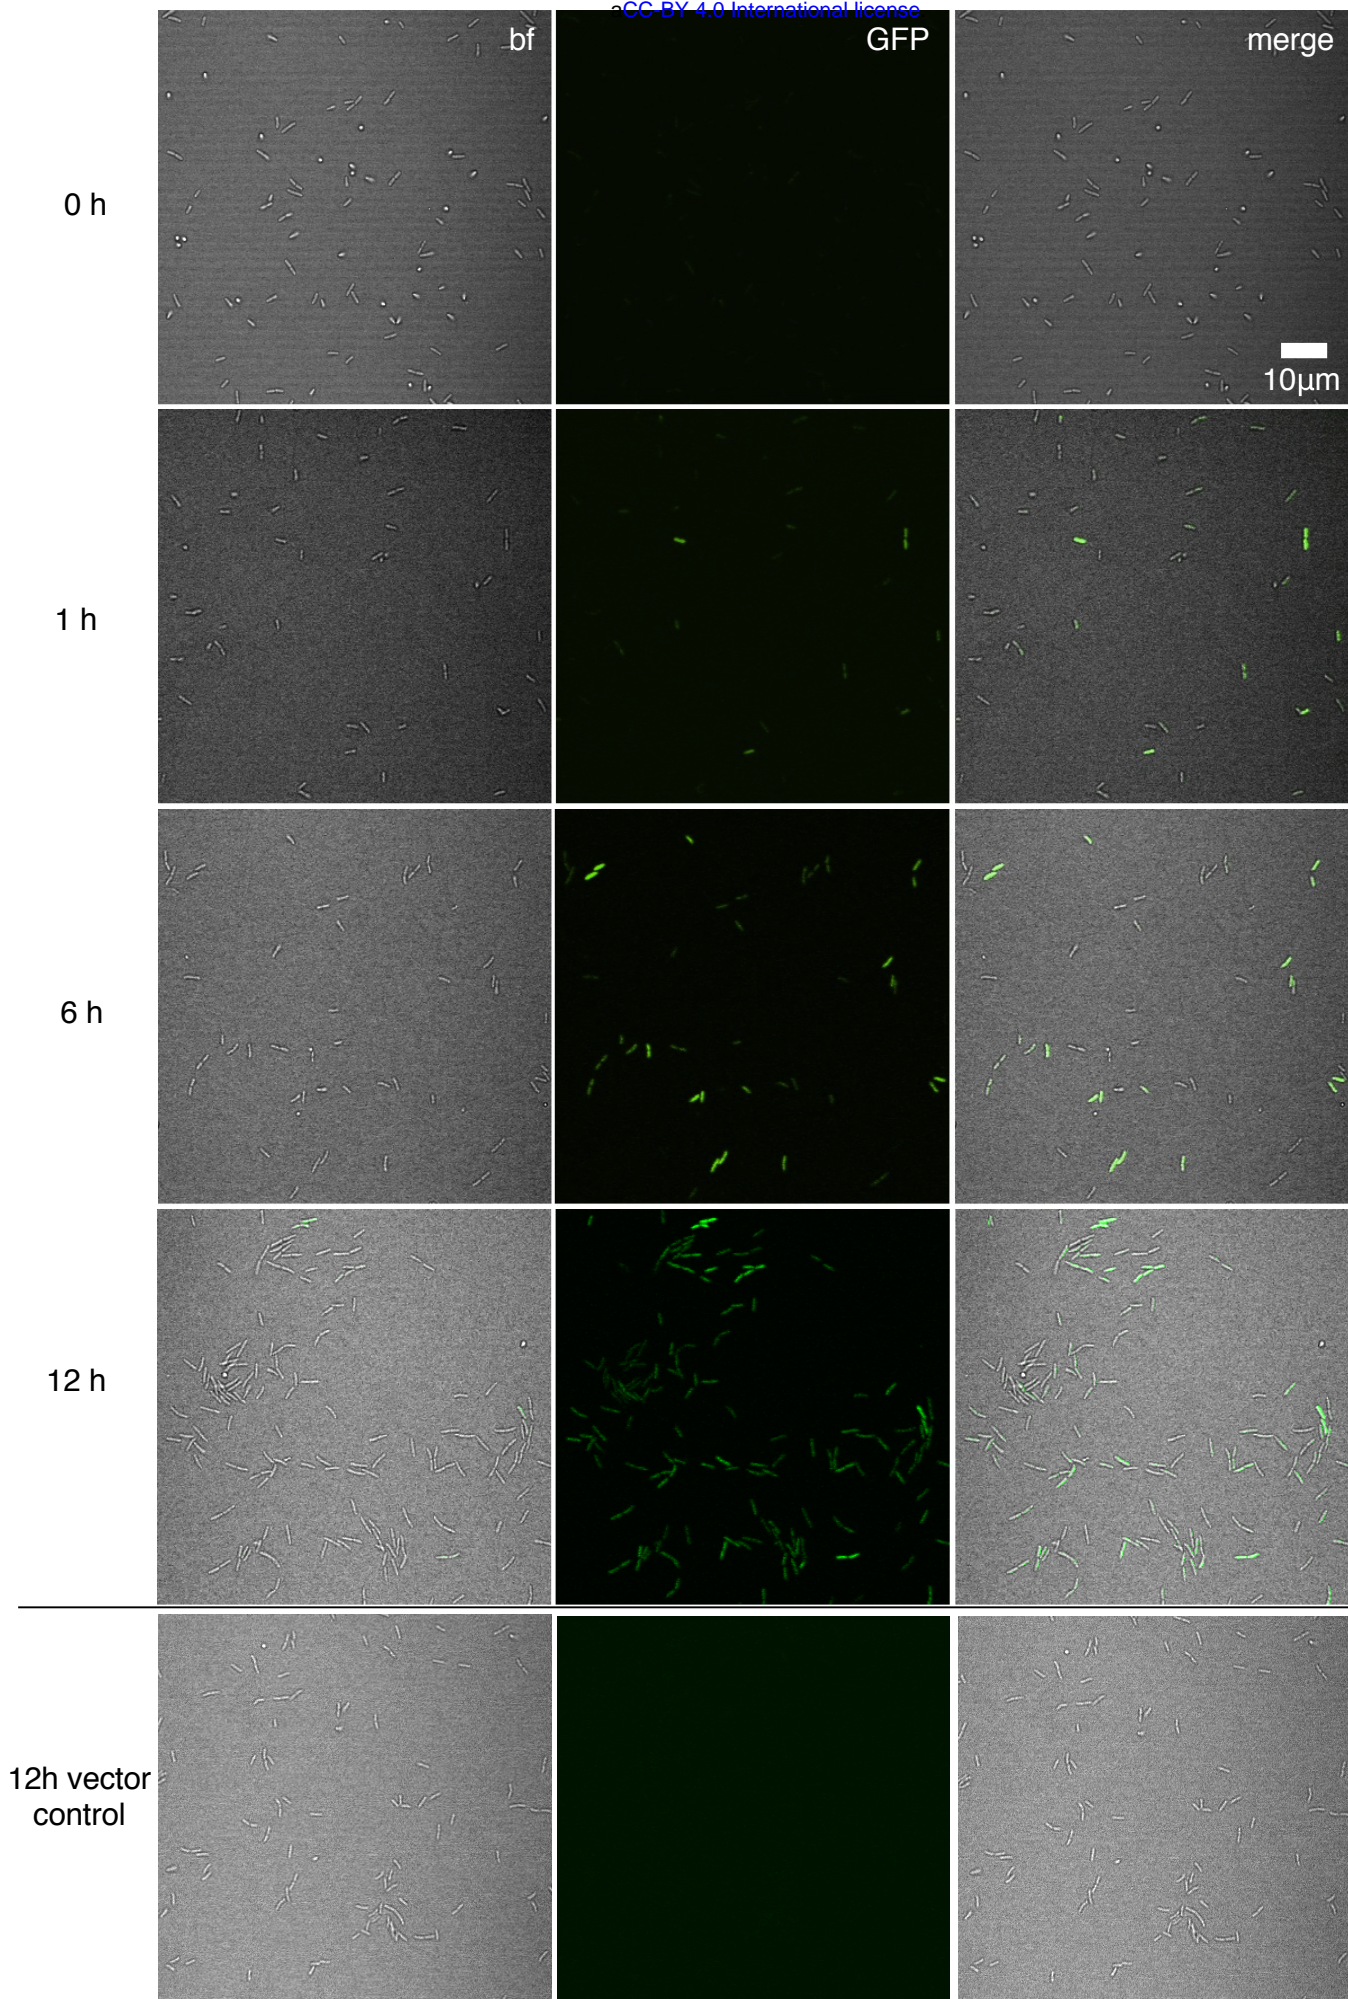

Figure 1 – Supplement 3

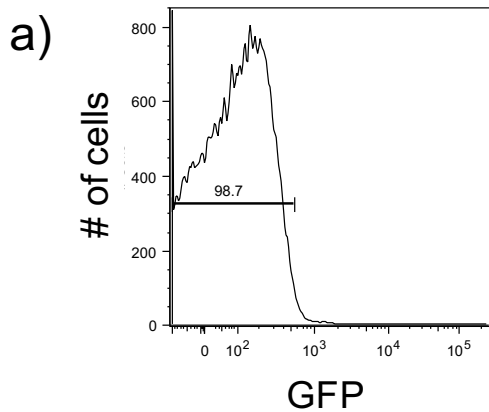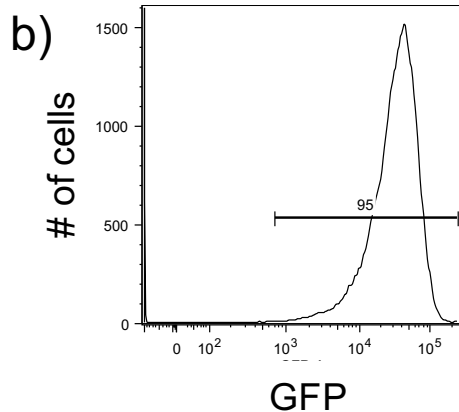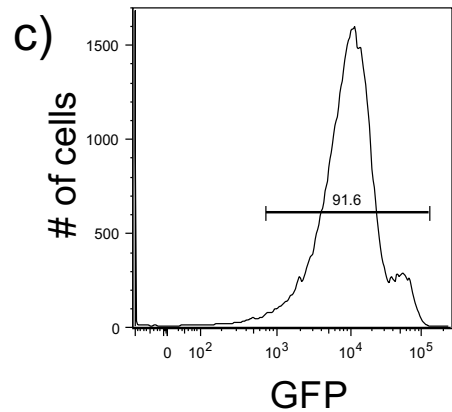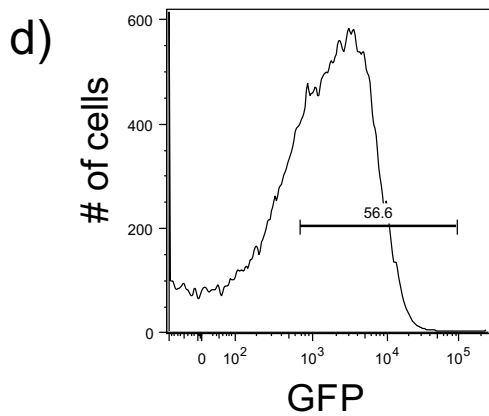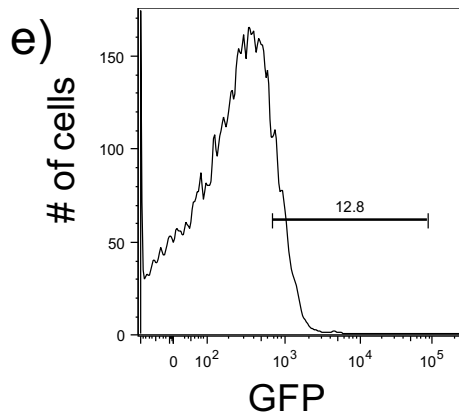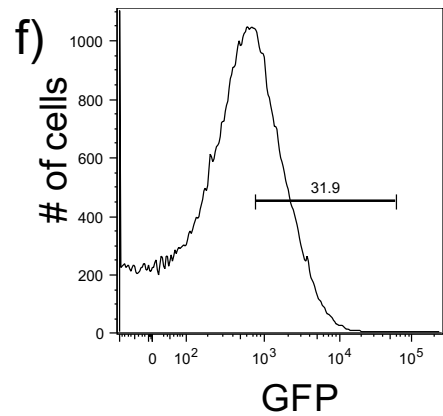

Figure 1 – Supplement 4

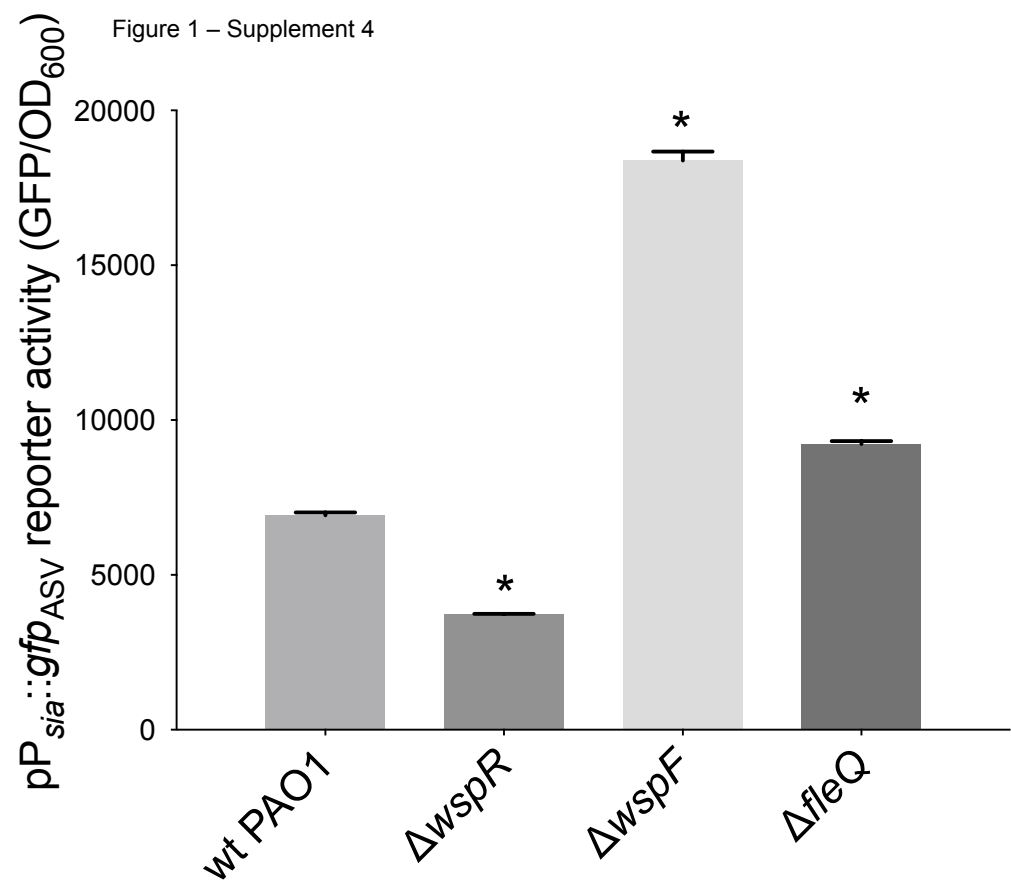

Figure 1 – Supplement 5

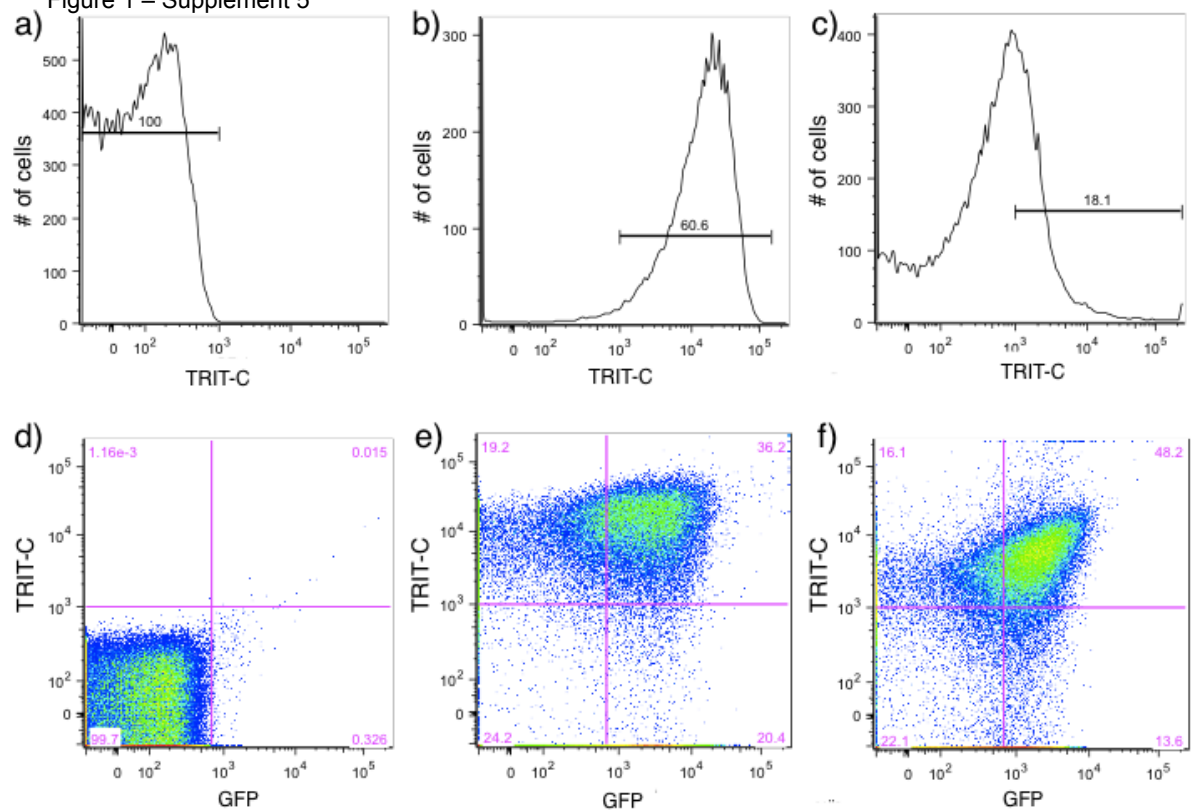



Figure 1 – Supplement 6

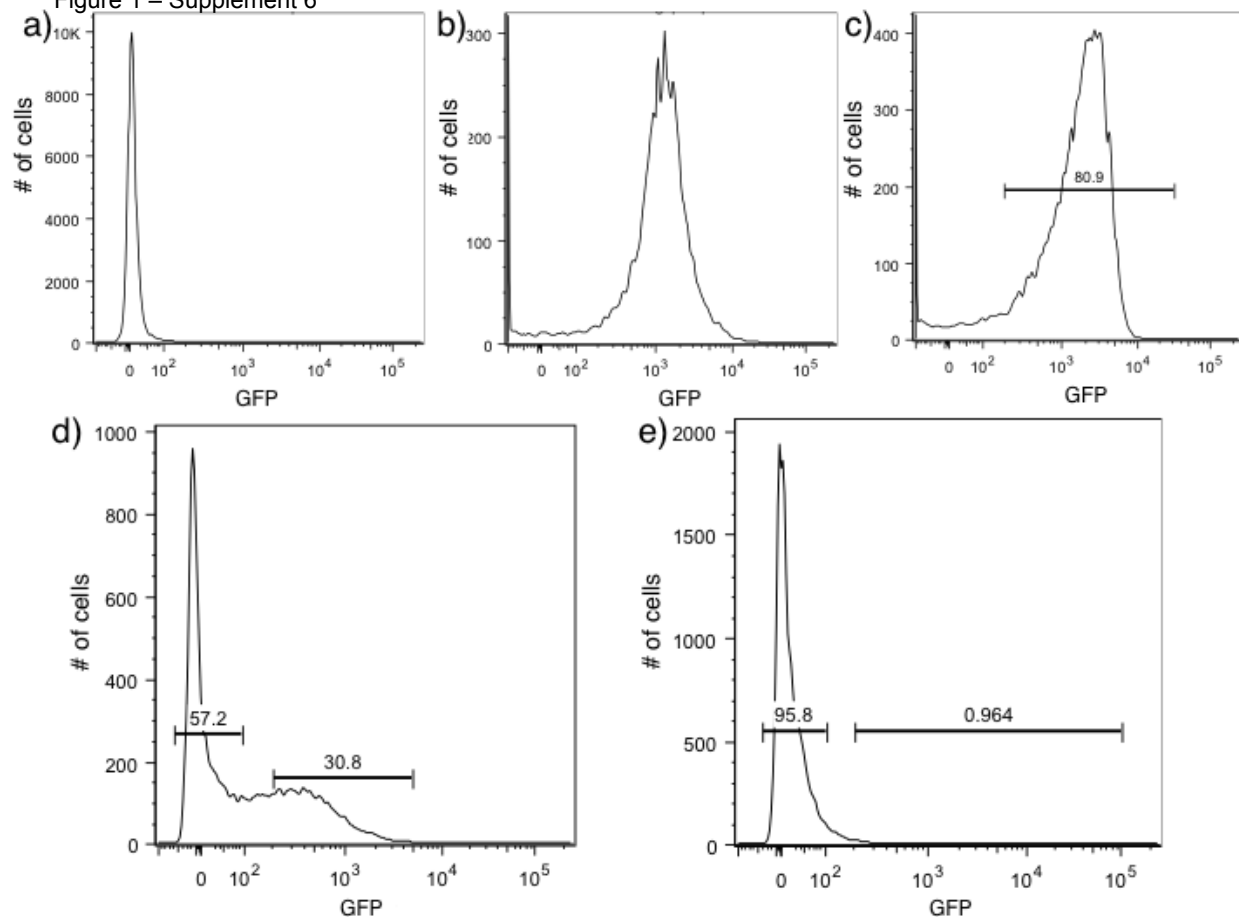

Figure 2 – Supplement 1

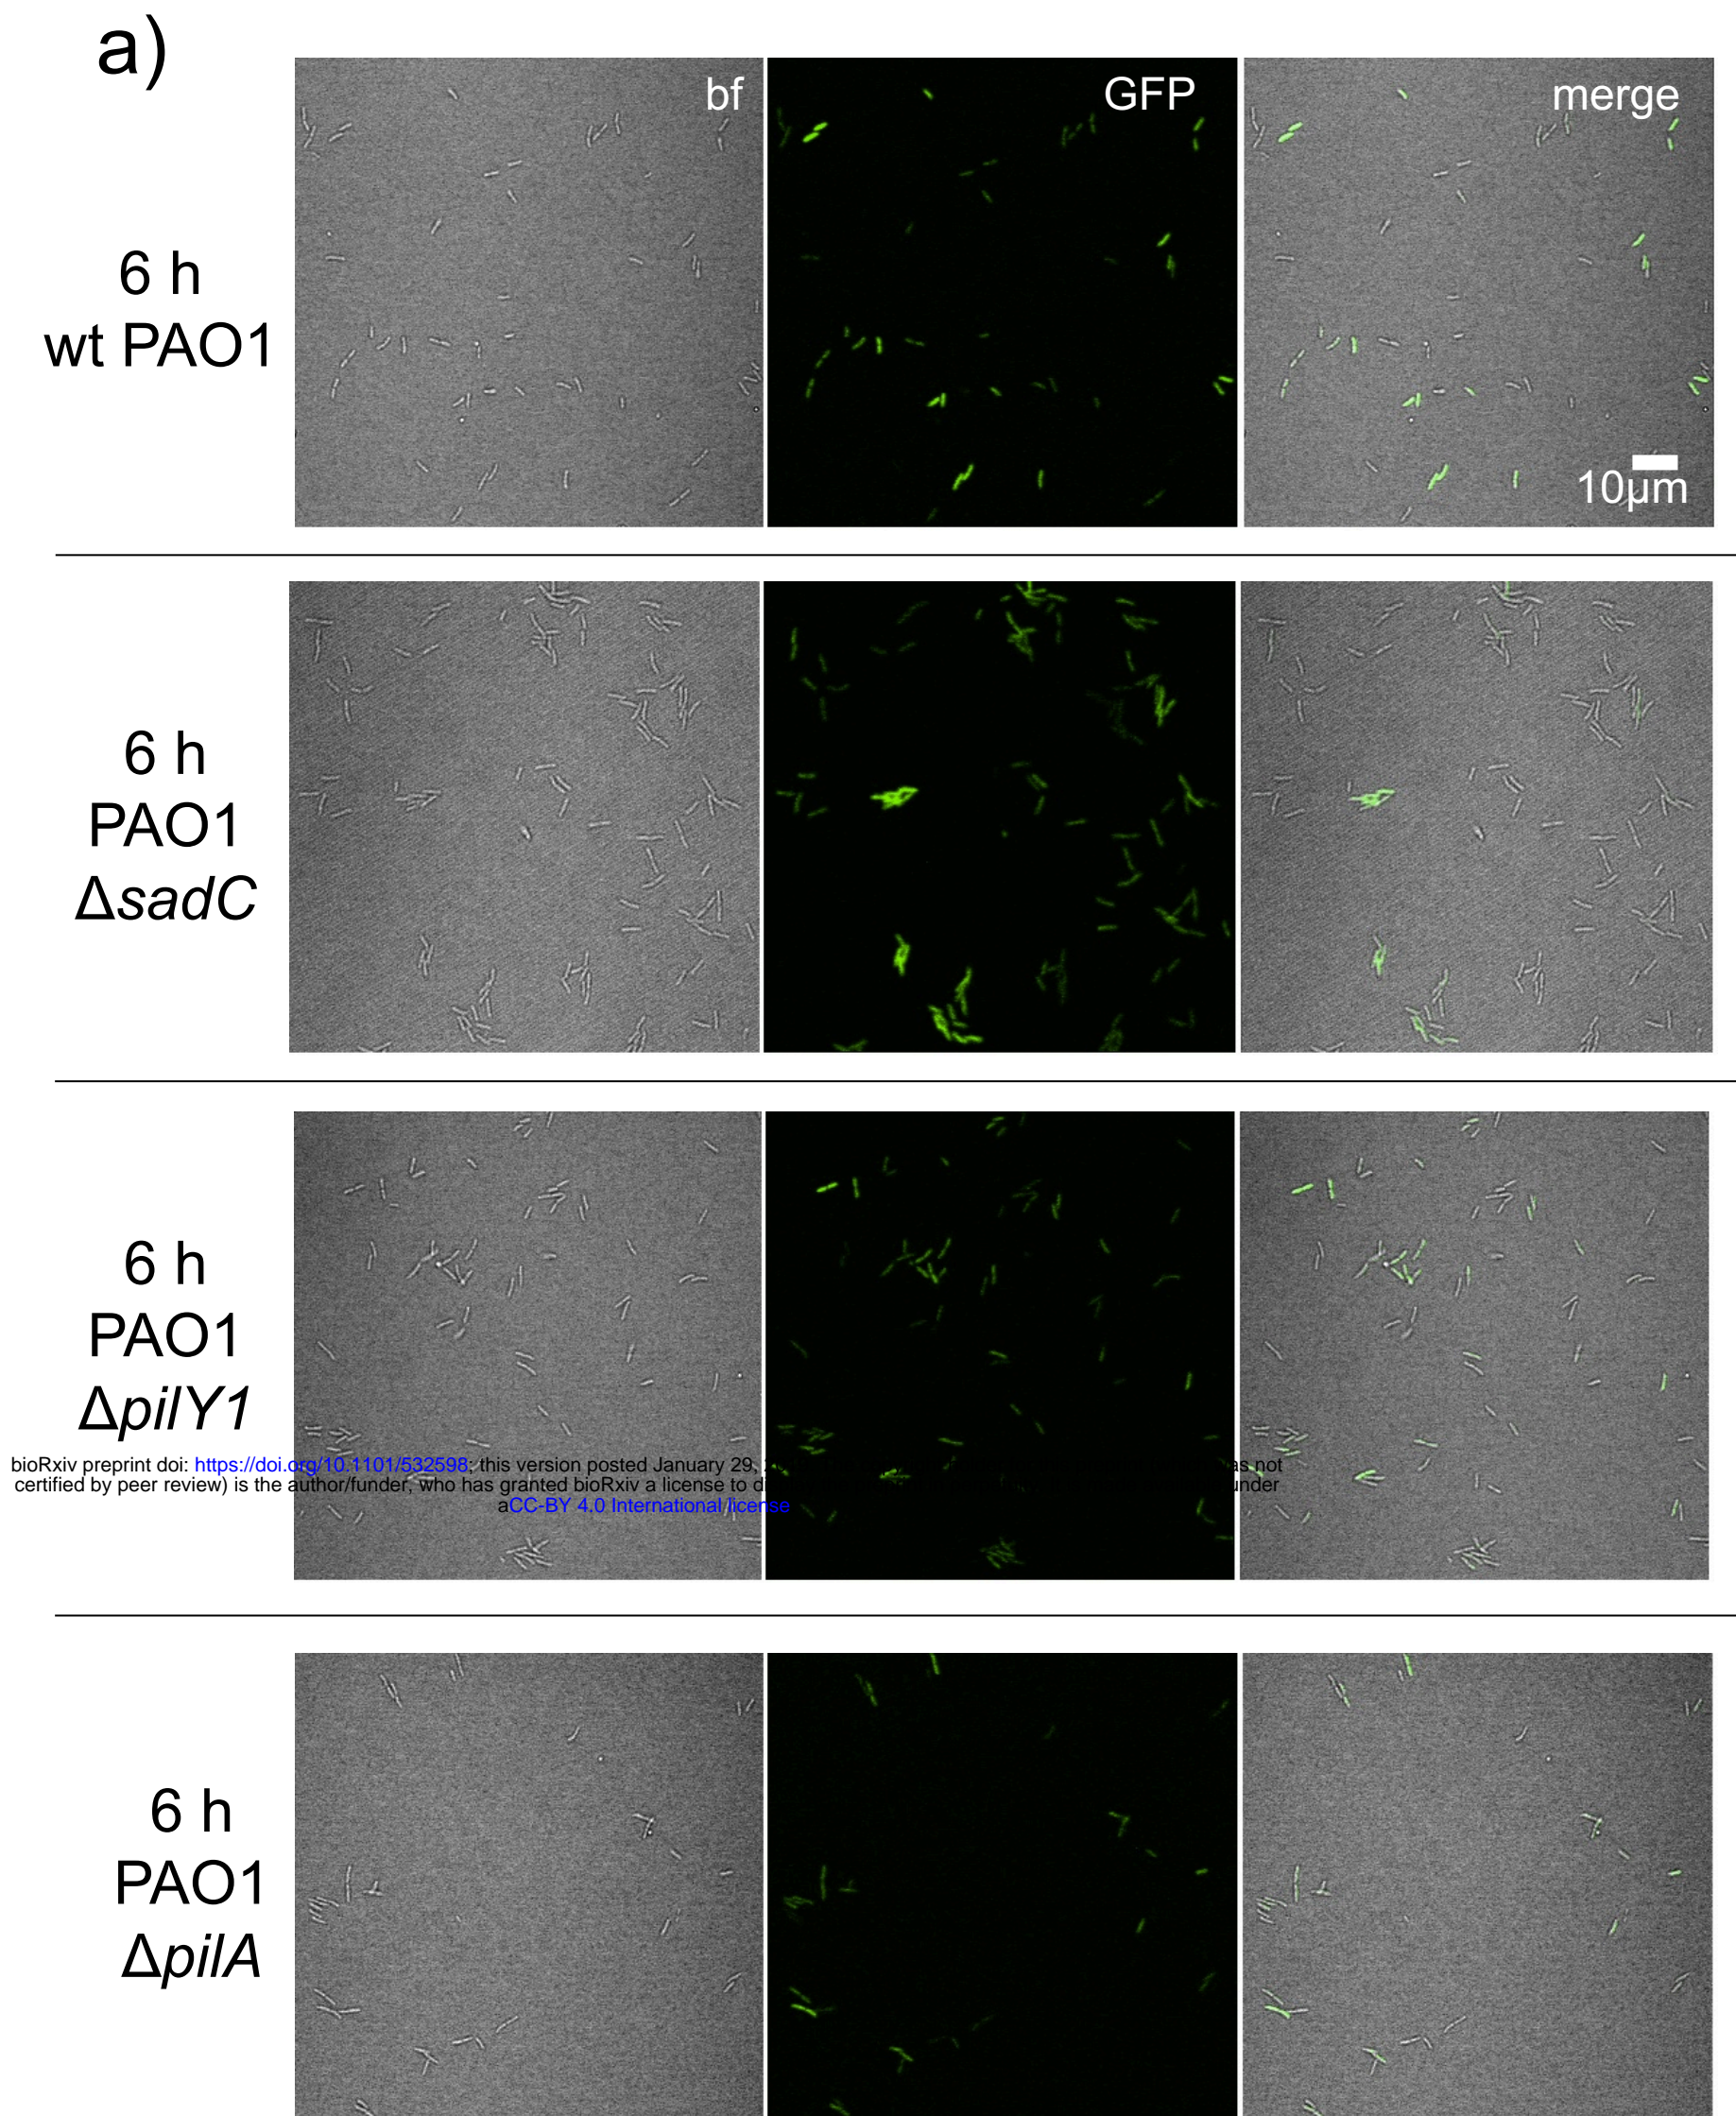

bioRxiv preprint doi: <https://doi.org/10.1101/532598>; this version posted January 29, 2019. The copyright holder for this preprint (which was not certified by peer review) is the author/funder, who has granted bioRxiv a license to display the preprint in perpetuity. It is made available under aCC-BY 4.0 International license.

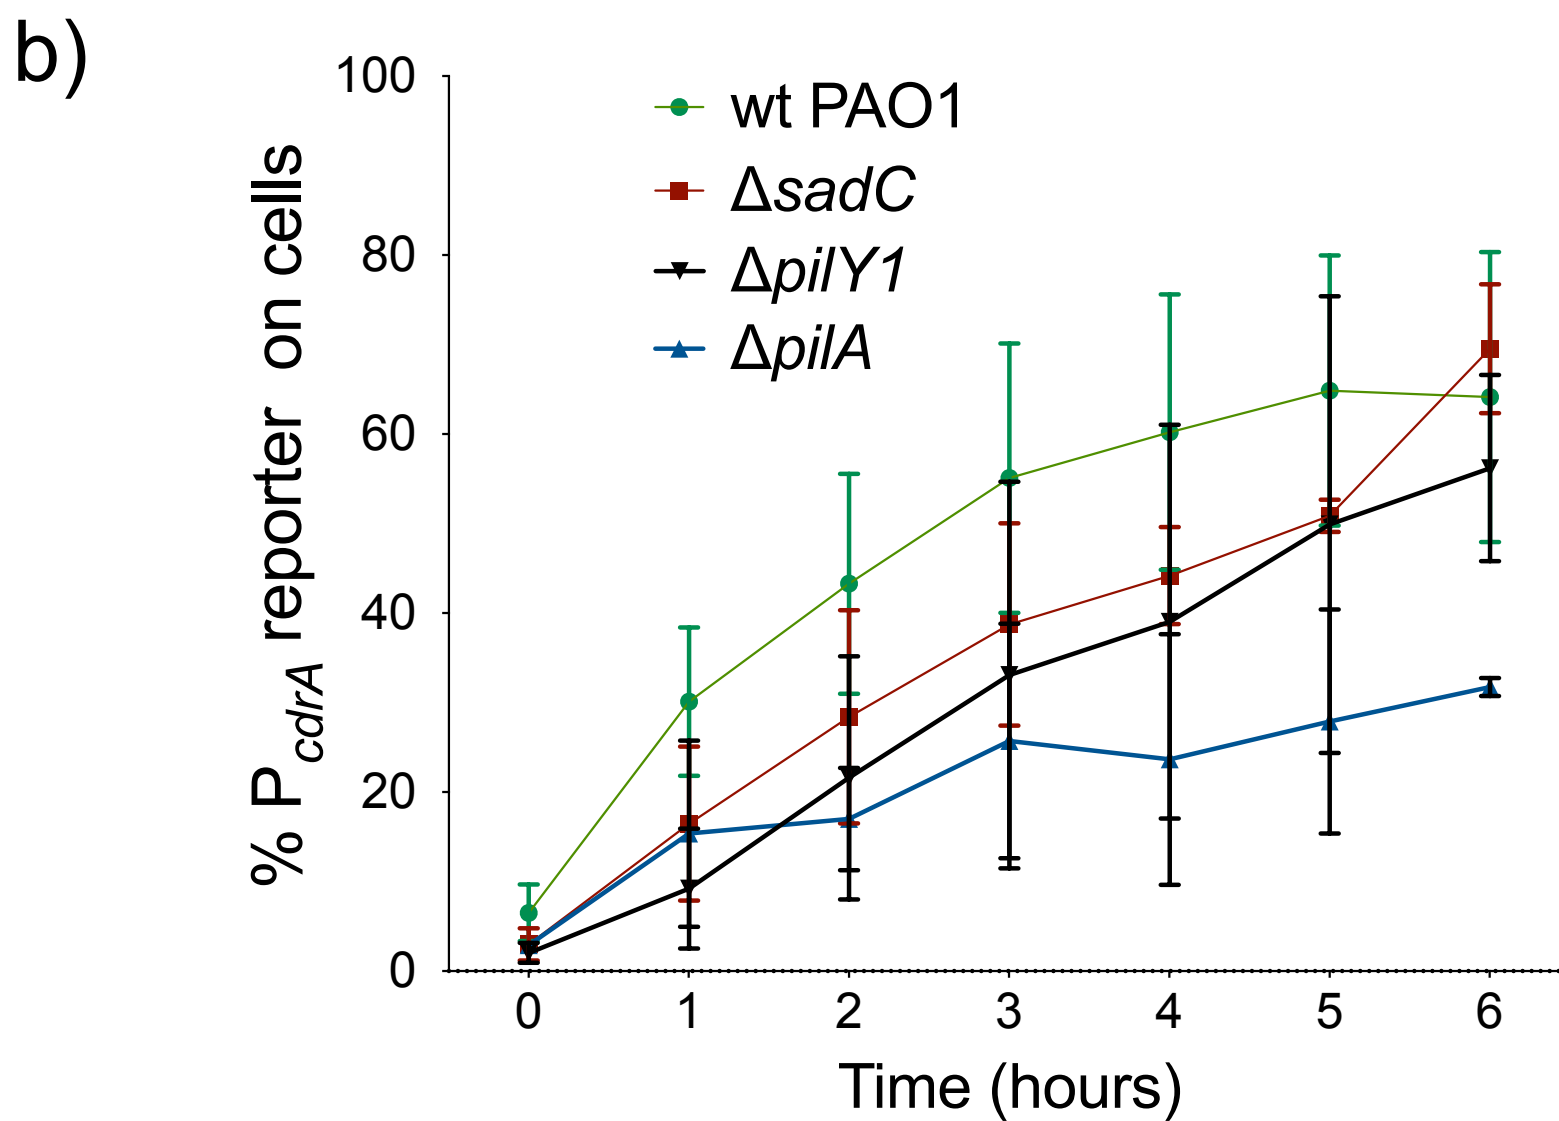

6 hr  
wt PAO1

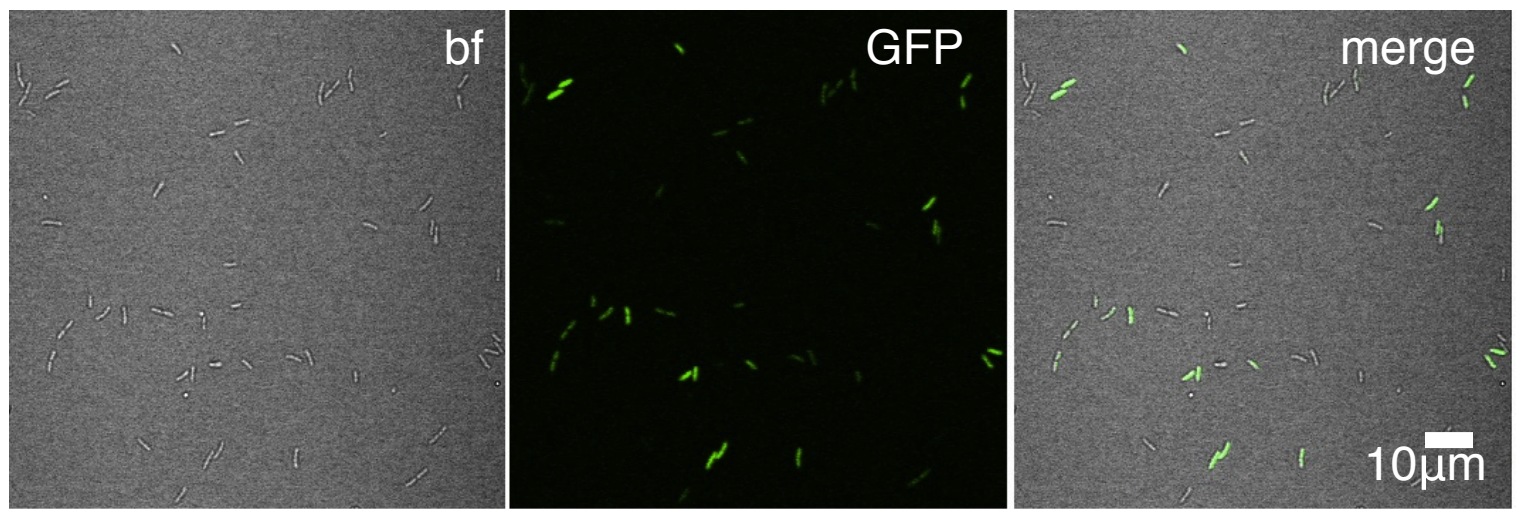

6 hr  
PAO1  
*ΔwspR*

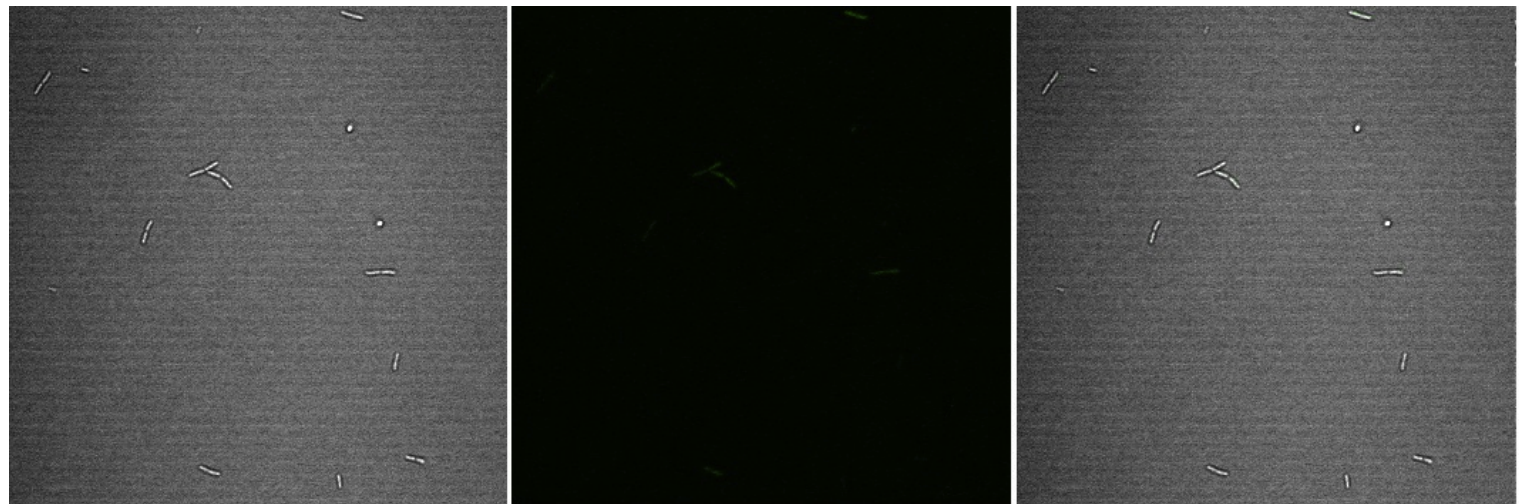

6 hr  
PAO1  
*ΔwspF*  
*Δpel Δpsl*

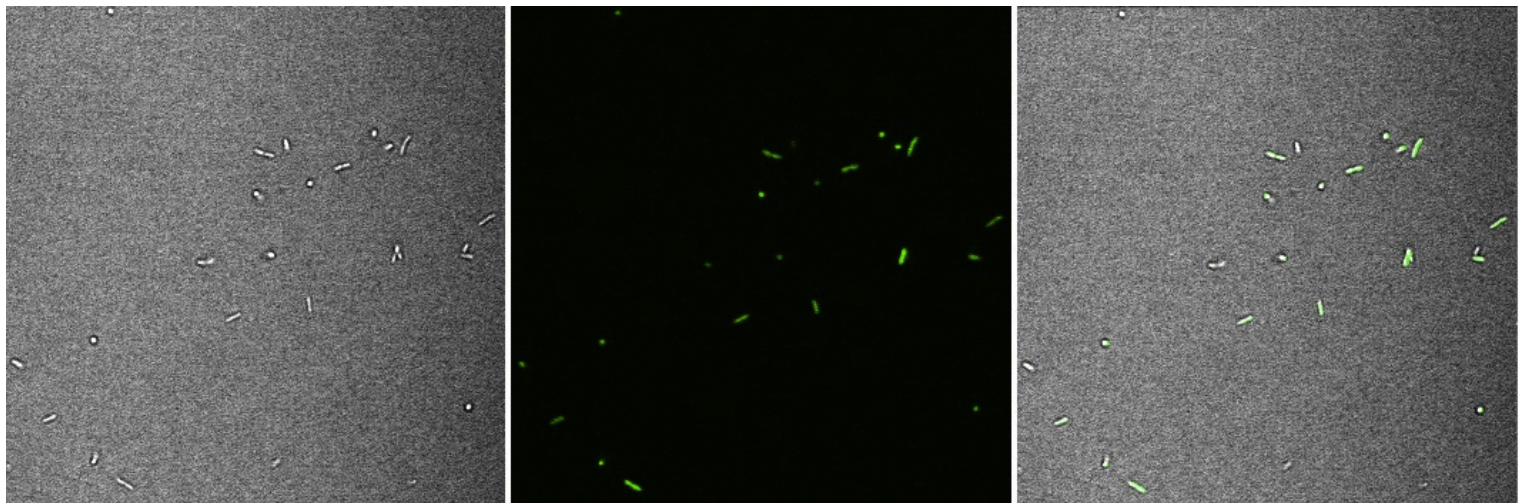

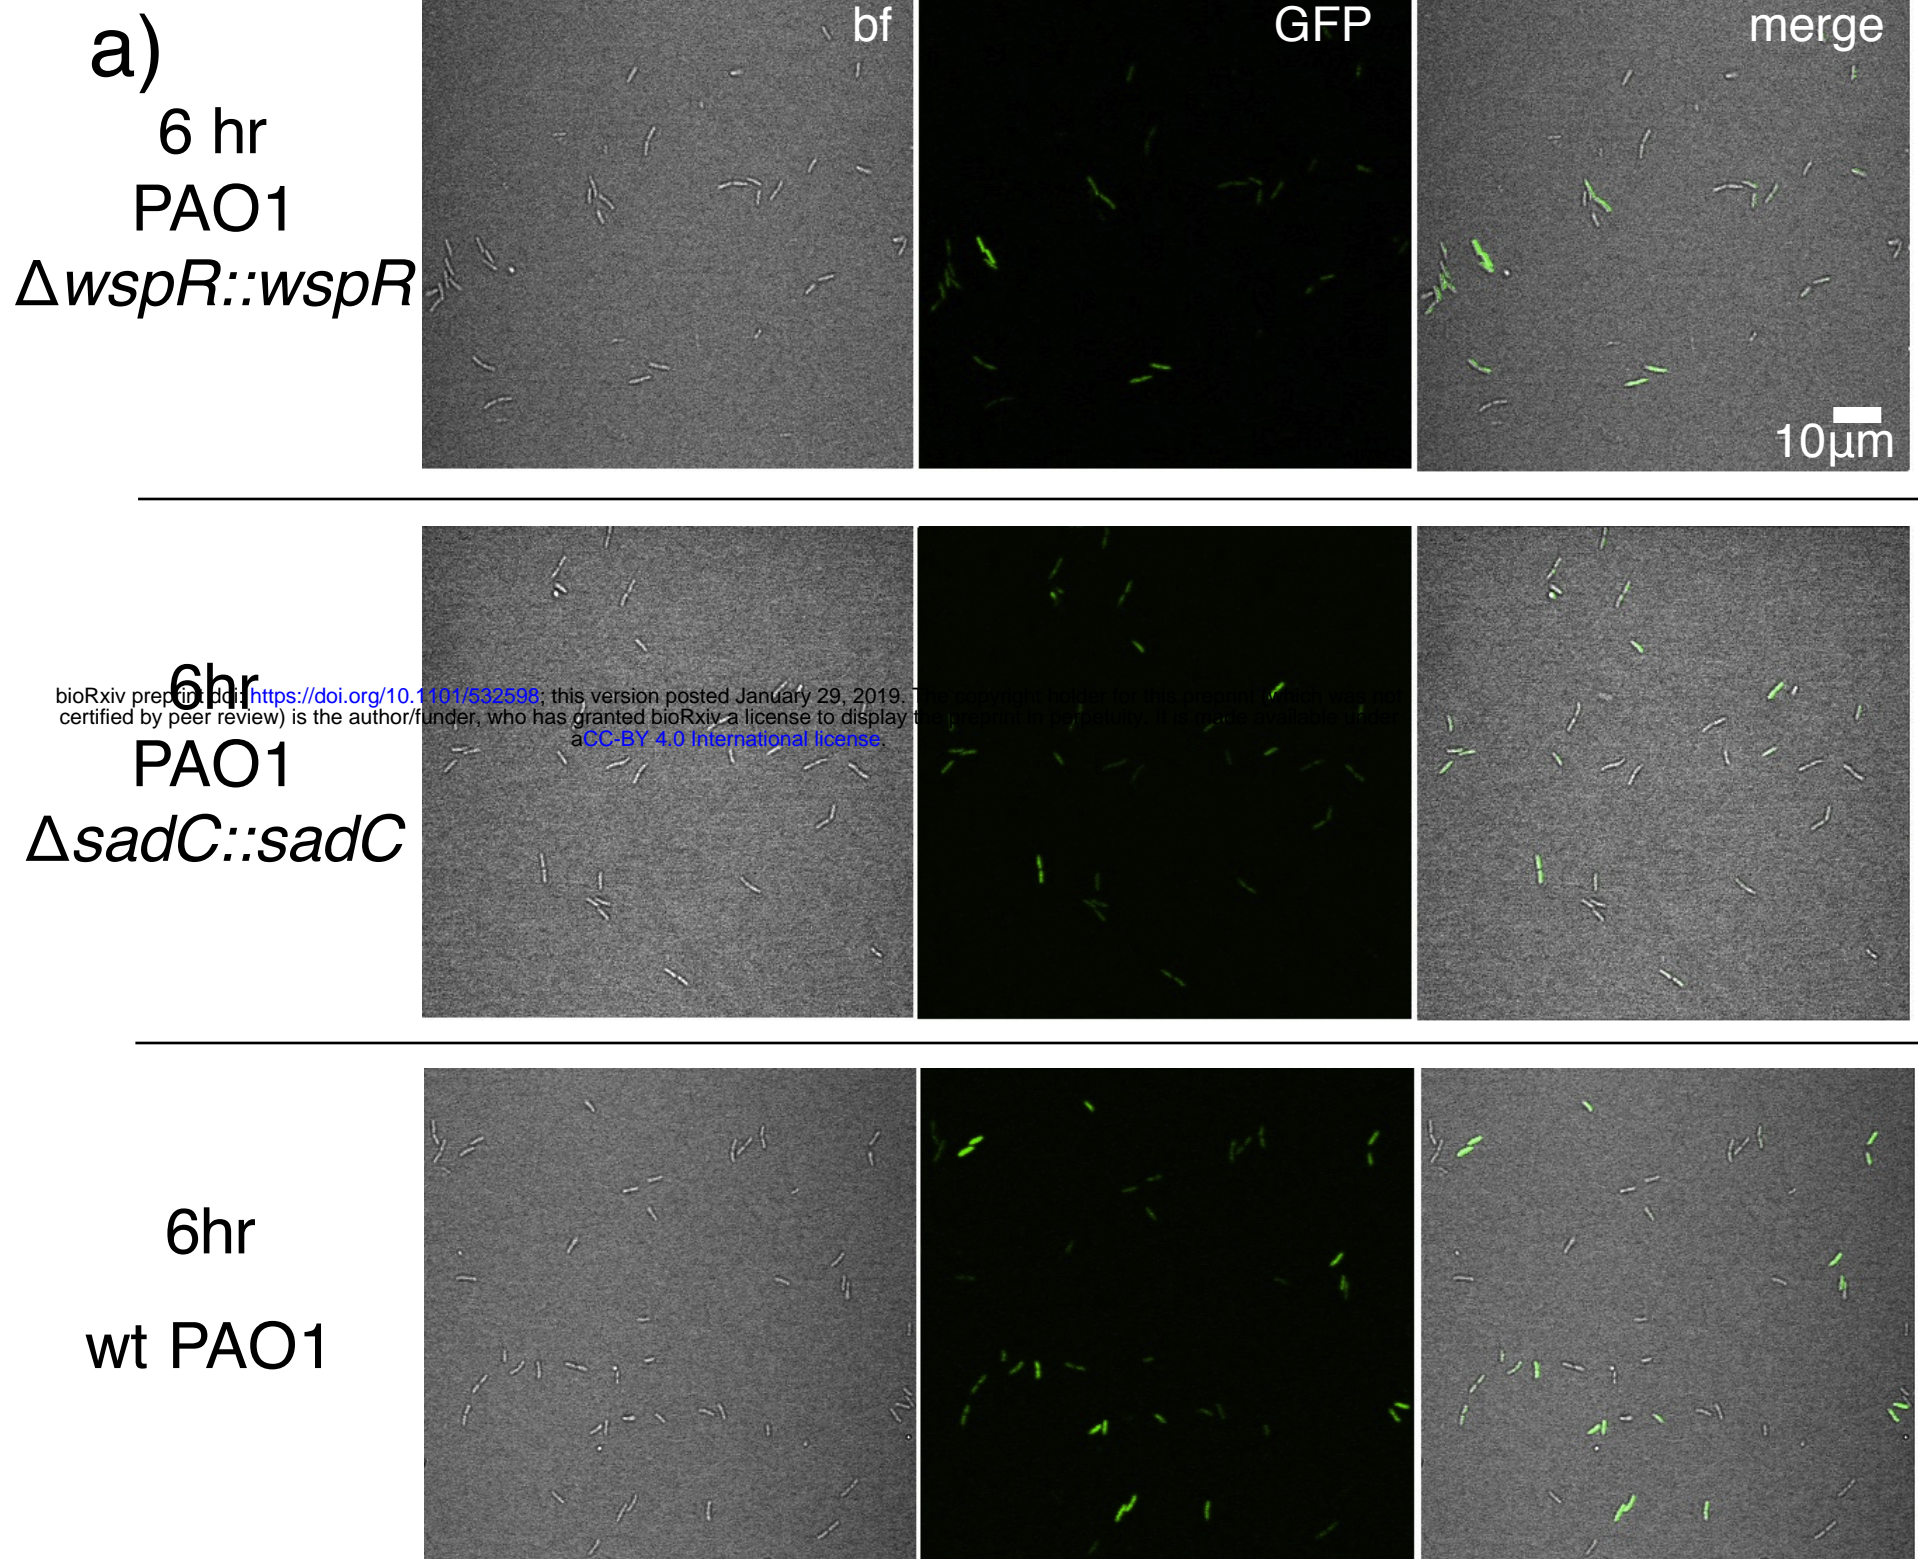

bioRxiv preprint doi: <https://doi.org/10.1101/532598>; this version posted January 29, 2019. The copyright holder for this preprint (which was not certified by peer review) is the author/funder, who has granted bioRxiv a license to display the preprint in perpetuity. It is made available under aCC-BY 4.0 International license.

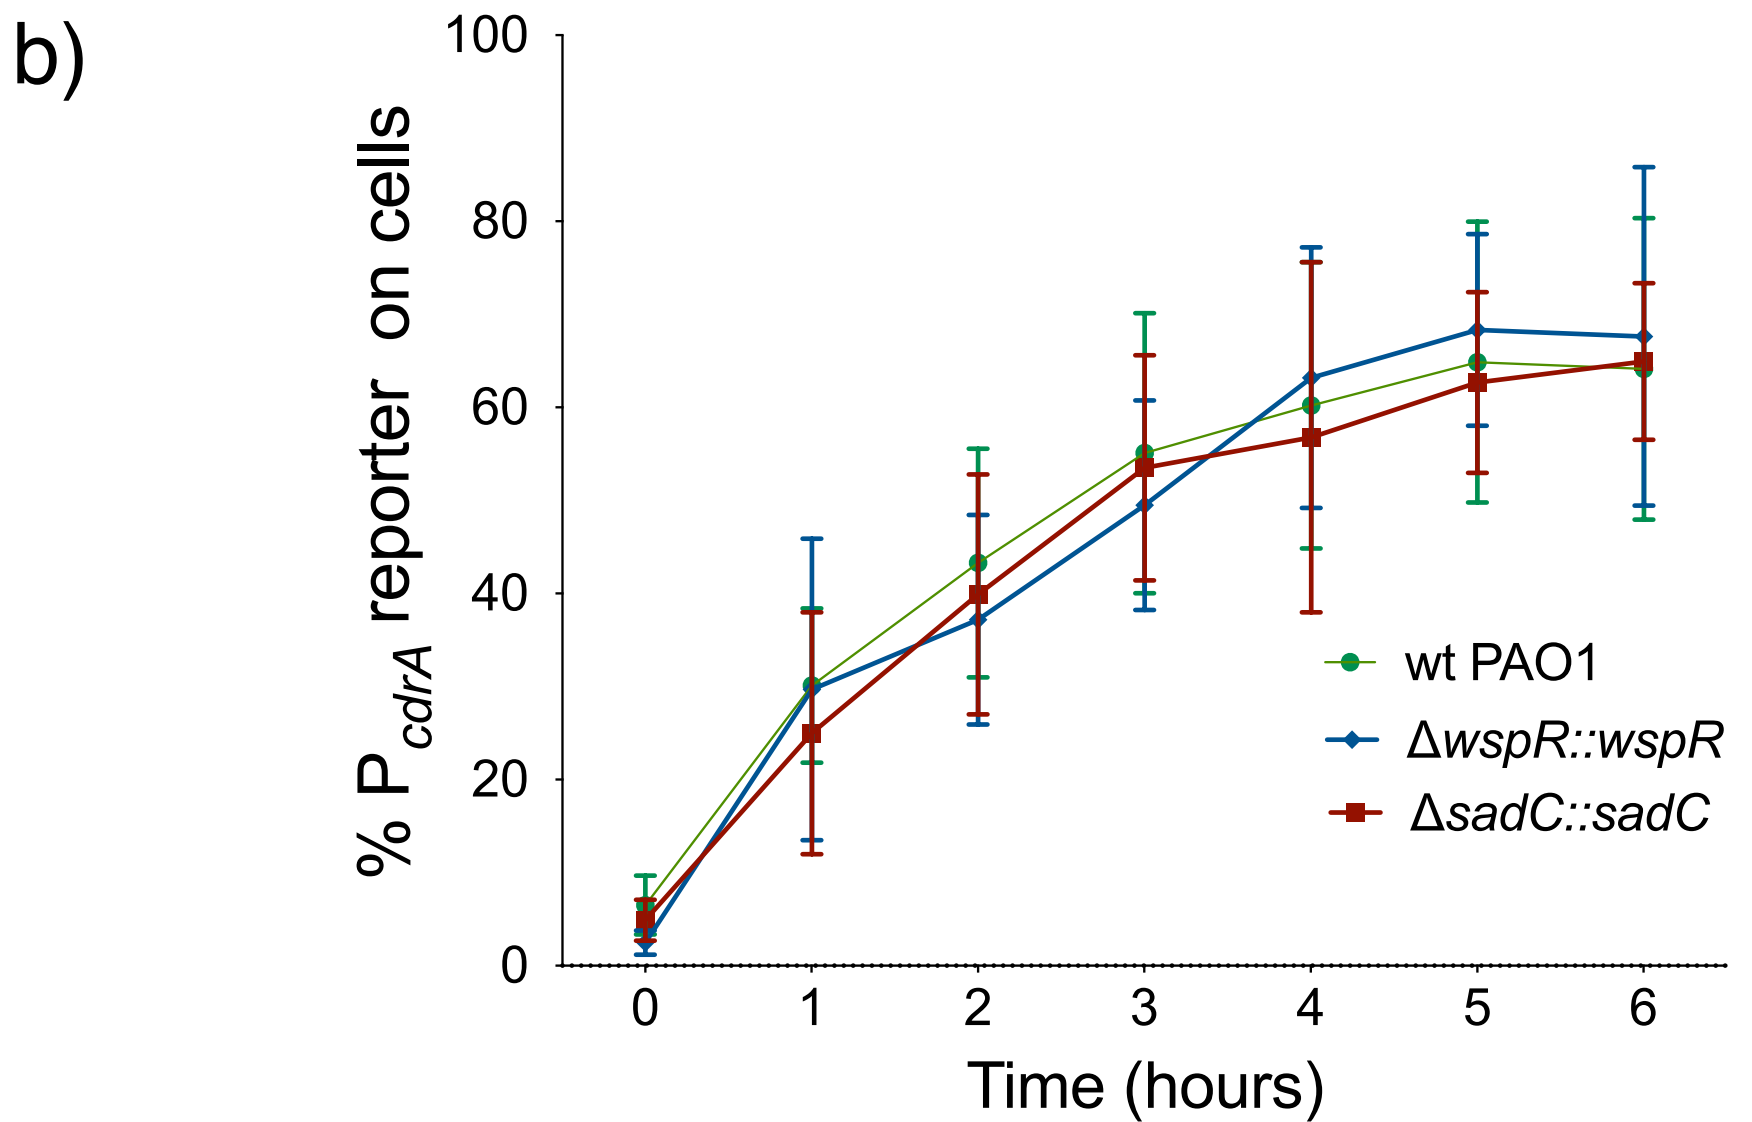

a)

6 h  
wt PA14

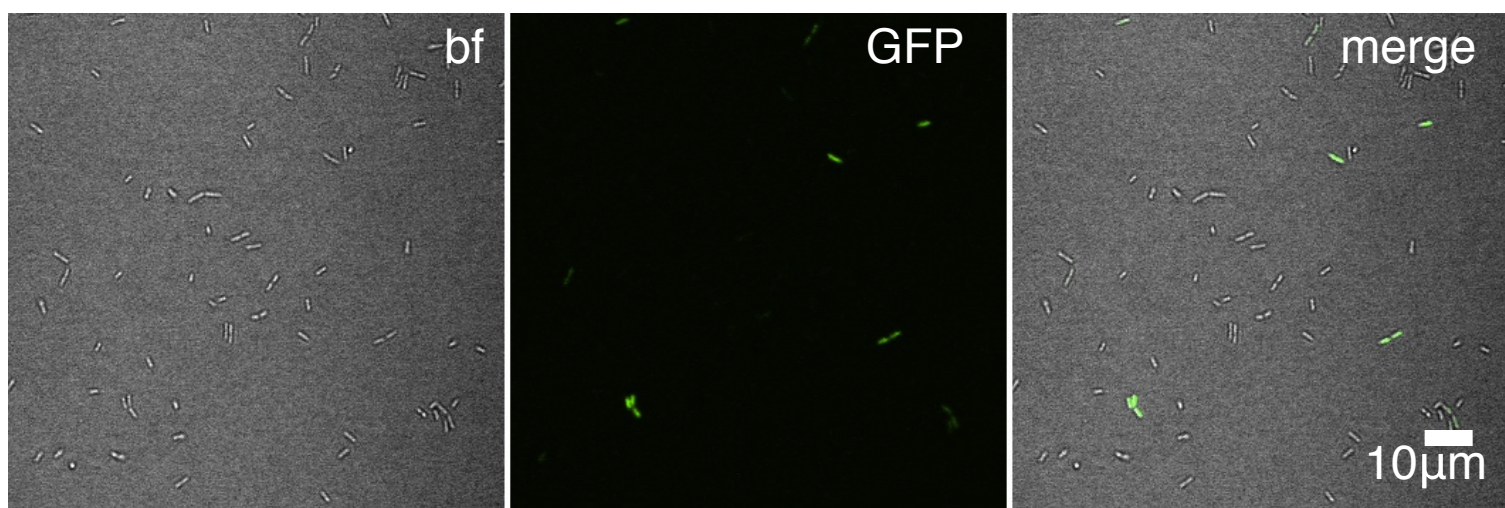

bioRxiv preprint doi: <https://doi.org/10.1101/532598>; this version posted January 29, 2017. The copyright holder for this preprint (which was not certified by peer review) is the author/funder, who has granted bioRxiv a license to display the preprint in perpetuity. It is made available under aCC-BY 4.0 International license.

6 h  
PA14  
 $\Delta wspR$

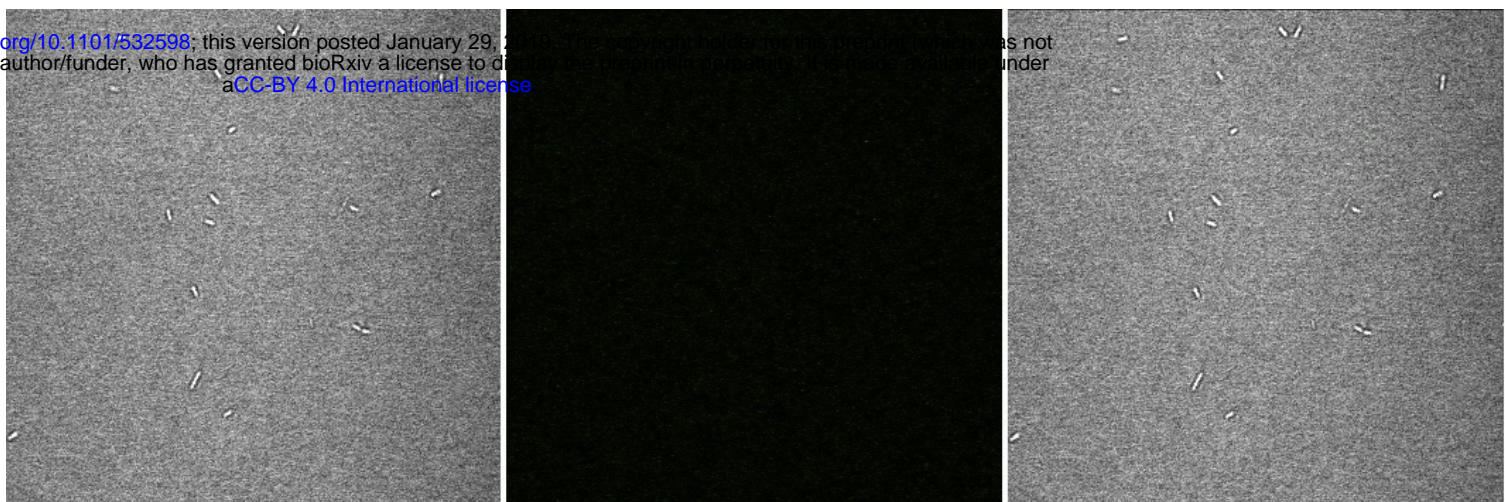

6 h  
PA14  
 $\Delta wspF$

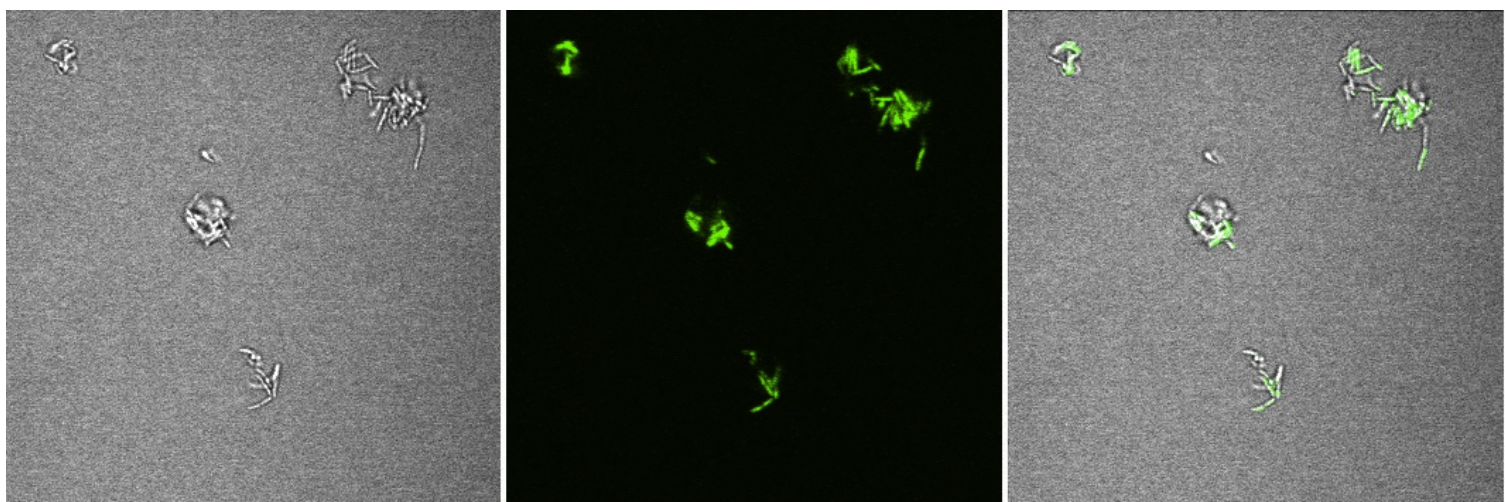

b)

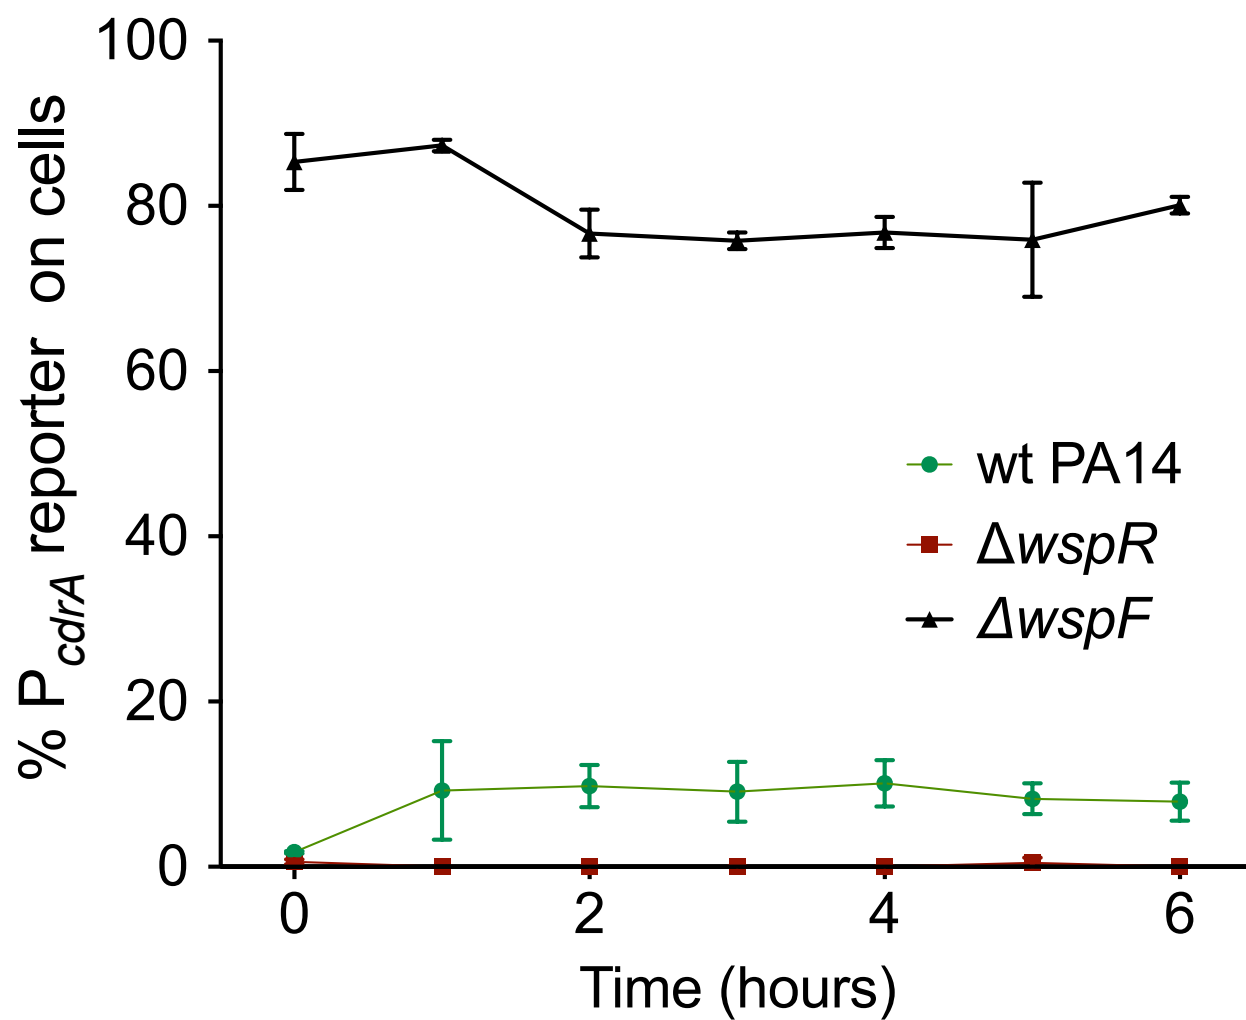

Figure 5 – Supplement 1

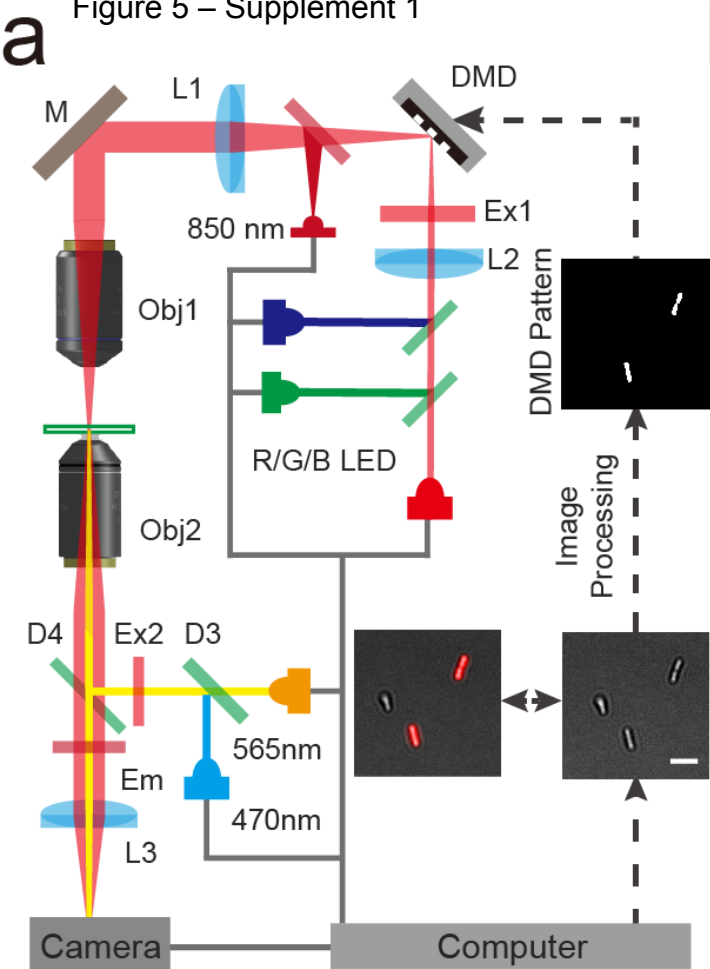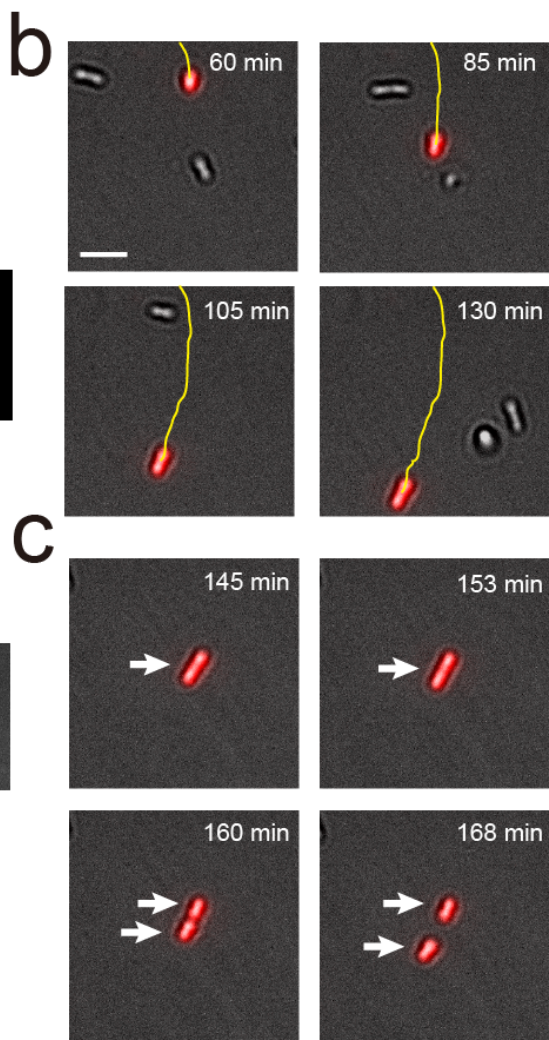

Figure 5 – Supplement 2

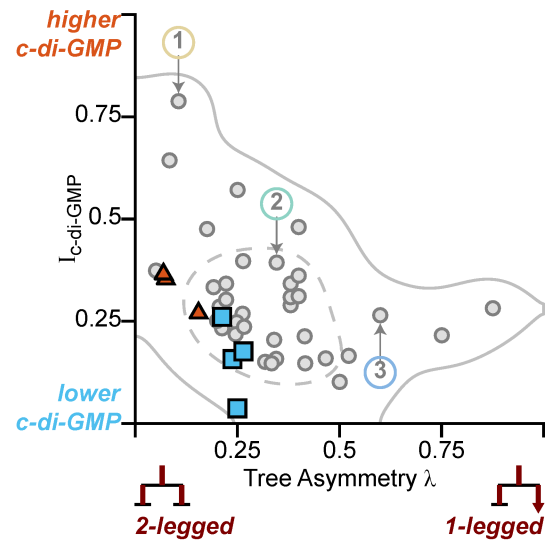

Source: https://www.biorxiv.org/content/10.1101/532598v1.full.pdf
